# Supplementary material for: Reconceptualising precision public health
Source: PubMed Central journal article supplement — BMJ Open. 2019 Sep 13;9(9):e030279. doi: 10.1136/bmjopen-2019-030279 (PMC6747655; doi:10.1136/bmjopen-2019-030279), 2019-09-13
Supplement: bmjopen-2019-030279.draft_revisions.pdf [file bmjopen-2019-030279.draft_revisions.pdf]

# BMJ Open

BMJ Open is committed to open peer review. As part of this commitment we make the peer review history of every article we publish publicly available.

When an article is published we post the peer reviewers' comments and the authors' responses online. We also post the versions of the paper that were used during peer review. These are the versions that the peer review comments apply to.

The versions of the paper that follow are the versions that were submitted during the peer review process. They are not the versions of record or the final published versions. They should not be cited or distributed as the published version of this manuscript.

BMJ Open is an open access journal and the full, final, typeset and author-corrected version of record of the manuscript is available on our site with no access controls, subscription charges or pay-per-view fees (<http://bmjopen.bmj.com>).

If you have any questions on BMJ Open's open peer review process please email [info.bmjopen@bmj.com](mailto:info.bmjopen@bmj.com)

# BMJ Open

## Reconceptualizing precision public health

|                                 |                                                                                                                                    |
|---------------------------------|------------------------------------------------------------------------------------------------------------------------------------|
| Journal:                        | <i>BMJ Open</i>                                                                                                                    |
| Manuscript ID                   | bmjopen-2019-030279.R1                                                                                                             |
| Article Type:                   | Communication                                                                                                                      |
| Date Submitted by the Author:   | 28-Mar-2019                                                                                                                        |
| Complete List of Authors:       | Olstad, Dana; University of Calgary Cumming School of Medicine<br>Mcintyre, Lynn; University of Calgary Cumming School of Medicine |
| <b>Primary Subject Heading</b>: | Public health                                                                                                                      |
| Secondary Subject Heading:      | Health policy                                                                                                                      |
| Keywords:                       | Precision public health, Social determinants of health, Health inequities, Social position                                         |
|                                 |                                                                                                                                    |

SCHOLARONE™  
Manuscripts

1  
2  
3 **Title:** Reconceptualizing precision public health  
4  
5  
6  
7

8 **Authors:** Dana Lee Olstad, Lynn McIntyre  
9  
10  
11

12 **Affiliation:** Department of Community Health Sciences, Cumming School of Medicine,  
13  
14 University of Calgary, 3280 Hospital Drive NW, Calgary, Alberta T2N 2Z6 Canada  
15  
16  
17  
18

19 **Email addresses:** [dana.olstad@ucalgary.ca](mailto:dana.olstad@ucalgary.ca); [lmcintyr@ucalgary.ca](mailto:lmcintyr@ucalgary.ca)  
20  
21  
22  
23

24 **Corresponding author:** Dr. Dana Lee Olstad, 3280 Hospital Drive NW, Calgary, Alberta T2N  
25  
26 2Z6 Canada; [dana.olstad@ucalgary.ca](mailto:dana.olstad@ucalgary.ca); +01 403-210-8673  
27  
28  
29  
30  
31  
32  
33  
34  
35  
36  
37  
38  
39  
40  
41  
42  
43  
44  
45  
46  
47  
48  
49  
50  
51  
52  
53  
54  
55  
56  
57  
58  
59  
60

## ABSTRACT

As it is currently conceived, precision public health is at risk of becoming precision medicine at a population level. This paper outlines a framework for precision public health that, in contrast to its current operationalization, is consistent with public health principles, and integrates personalized and population-based approaches. We review the conceptual foundations of public health, outline a proposed framework for precision public health, and describe its operationalization within research and practice. Social position shapes individuals' unequal experiences of the social determinants of health. Thus, in our formulation, precision public health investigates how multiple dimensions of social position interact to confer health risk differently for precisely defined population subgroups according to the social contexts in which they are embedded. It leverages this information to uncover the precise and intersecting social structures and processes that pattern health outcomes, and to identify actionable interventions within the social contexts of affected groups. We contend that studies informed by this framework offer greater potential to improve health than current conceptualizations of precision public health which do not address root causes. Moreover, expanding beyond master categories of social position (i.e. income, education, occupation), operationalizing these categories in more precise ways across place and time and examining overlap, can enrich public health research through greater attention to the heterogeneity of social positions, their causes and health effects, leading to identification of points of intervention that are specific enough to be useful in reducing health inequities. Failure to attend to this level of particularity may mask the true nature of health risk, the causal mechanisms at play and the most appropriate interventions. Conceptualized thus, precision public health is a research endeavour with much to offer by way of understanding and intervening on the causes of poor health and health inequities.

1  
2  
3  
4  
5  
6  
7  
8  
9  
10  
11  
12  
13  
14  
15  
16  
17  
18  
19  
20  
21  
22  
23  
24  
25  
26  
27  
28  
29  
30  
31  
32  
33  
34  
35  
36  
37  
38  
39  
40  
41  
42  
43  
44  
45  
46  
47  
48  
49  
50  
51  
52  
53  
54  
55  
56  
57  
58  
59  
60

**Keywords:** Precision public health; Social determinants of health; Health inequities; Social position; Social context

For peer review only

## INTRODUCTION

### From precision medicine to precision public health

In January 2015, US President Barack Obama boldly proclaimed that precision medicine would radically transform health by tailoring treatment and prevention to the biological risk profile of the individual patient.<sup>1</sup> These individualized medical interventions would emerge from analyzing data in large biobanks, sequencing more genomes and linking biological information to electronic health records. Efforts are now underway worldwide to achieve this aim. The idea that better health might be achieved through such approaches is consistent with a biomedical model of health which posits that health is primarily a product of individual biological (e.g. genetics, age, sex) and behavioural risk factors (e.g. dietary intake, physical activity, sleep patterns).

Despite the dominance of this model within modern medical practice, evidence indicates that these individual level risk factors account for very little of the variation in disease risk at a population level.<sup>2,3</sup> Instead, differences in health status appear to be largely attributable to the living conditions individuals encounter on a daily basis, and cumulatively over their life course.<sup>4</sup>

Regardless of whether precision medicine succeeds in tailoring treatment to the biological risk profiles of individual patients, because of the limited explanatory power of individual level risk factors, it cannot yield the promised transformations in ill health at a population level. Imagine that John Snow had applied the tools of precision medicine during the 1854 cholera outbreak. He may have advised his countrymen to seek treatment individualized to their genetic susceptibility, or advised those at highest risk to alter their health behaviours. Instead, by simply removing the handle of the Broad Street pump, Snow changed the social conditions in which residents lived, preventing them from becoming sick in the first place. There must be a balance between

1  
2  
3 attention to individual biological and behavioural risk factors, and the avoidable risk factors for  
4 disease that arise from the conditions of daily life. Moreover, interventions based in a biomedical  
5 model of health remain fundamentally agnostic on the subject of health inequities, and to the  
6 extent that access to care is often greater for those with greater means,<sup>5</sup> may even exacerbate  
7 them.  
8  
9  
10  
11  
12  
13

### 14 15 16 17 **Current conceptualizations of precision public health**

18  
19 Initially proposed in Australia in 2013 as a complement to the precision medicine initiative,<sup>6</sup>  
20 precision public health has been variously characterized as “providing the right intervention to  
21 the right population at the right time”,<sup>7</sup> “applying emerging methods and technologies for  
22 measuring disease, pathogens, exposures, behaviors, and susceptibility in populations to improve  
23 health”,<sup>8</sup> among others. Big data and informatics are central to most definitions, and indeed  
24 some suggest that the use of such data are the defining feature of a precision public health  
25 approach.<sup>6,9</sup> Priority actions centre upon collecting data from large, diverse samples, amassing  
26 unbiased genetic and environmental data, education, public health-health care partnerships, early  
27 detection especially through genome sequencing, and enhancing public health surveillance and  
28 tracking.<sup>7,9</sup> It has further been suggested that the aims of precision medicine and public health  
29 might be reconciled through scaling-up precision medicine approaches to whole populations,<sup>6</sup>  
30 and by incorporating information on environmental and socioeconomic factors into precision  
31 medicine analyses.<sup>10</sup>  
32  
33  
34  
35  
36  
37  
38  
39  
40  
41  
42  
43  
44  
45  
46  
47  
48  
49  
50

51 It therefore appears that, as currently conceived, precision public health is merely precision  
52 medicine scaled-up to a population level, often through leveraging big data, the science of  
53  
54  
55  
56  
57

1  
2  
3 ‘omics’ and other technological advancements.<sup>11</sup> Noticeably absent from this body of literature  
4  
5 is focused attention to foundational public health concepts such as social position, the social  
6  
7 determinants of health and health inequities, nor to their political and social origins, meanings  
8  
9 and implications. That the modern conception of precision public health should be so heavily  
10  
11 rooted in a biomedical paradigm of health is antithetical to the very foundations of public health,  
12  
13 and points to a need for a profound realignment.  
14  
15

## 16 17 18 19 **Objectives**

20  
21 The purpose of this paper is to posit a precision public health approach that addresses the social  
22  
23 causation of health and health inequities as worthy of at least equal attention and investment as is  
24  
25 precision medicine. We offer a renewed vision for precision public health that places social  
26  
27 position and its context-specific interacting dimensions, determinants, and health consequences  
28  
29 at the heart of study, and seeks to study these with greater precision in order to identify points of  
30  
31 intervention that are specific enough to be useful in reducing health inequities. In this way, the  
32  
33 framework offers a means to integrate personalized and population-based approaches to  
34  
35 prevention. We argue that the proposed framework may offer greater potential to improve health  
36  
37 and reduce health inequities than both biomedically-based notions of precision public health that  
38  
39 do not address root causes, and public health as currently practiced which, although it addresses  
40  
41 root causes, does so in a homogenizing way. We begin with a brief review of the conceptual  
42  
43 foundations of public health, then present a case for more precise attention to social position  
44  
45 within a reconceptualized framework for precision public health, and describe its  
46  
47 operationalization within research and practice.  
48  
49  
50  
51  
52  
53  
54  
55  
56  
57  
58  
59  
60

## CONCEPTUAL FOUNDATIONS OF PUBLIC HEALTH

### Social determinants of health

The social determinants of health encompass the conditions of daily life in which individuals are born, grow, live, work and age, including features associated with their early childhood, employment grade, housing conditions, incomes, experiences of discrimination, neighbourhood environments and level of education.<sup>4</sup> Individual biology and health behaviours are included, but occupy a less prominent role. That the quality of social conditions should so fundamentally shape the health of individuals and populations was perhaps most convincingly demonstrated by the Whitehall Studies of British civil servants, whereby it was shown that health declined with each step down the social ladder, even among a group of relatively well-paid individuals with stable employment, and for whom health care was provided as a matter of right.<sup>2</sup> The 2008 report of the WHO Commission on the Social Determinants of Health synthesized evidence on the social determinants of health into a coherent framework and agenda for action.<sup>4</sup> A key contribution was its acknowledgment that addressing the social determinants of health implies a joint attack on both the social causes of poor health and health inequities.

### Health inequities and social position

Health inequities are systematic differences in health between groups occupying unequal positions within society.<sup>4</sup> These differences are not merely a problem between the extremes of the continuum, but are evident across the entire social gradient. Health inequities are a consequence of societal structures that distribute resources, power and prestige according to factors such as income, education, occupation, and others.<sup>4</sup> While the term health inequalities refers to differences in health, the concept of inequities invokes a moral judgement that these

1  
2  
3 differences are unfair because they are potentially avoidable. Inherent within a social  
4  
5 determinants perspective is the need to attend to both the social factors that shape the health of  
6  
7 individuals and populations, and the social processes that govern their social patterning.<sup>4 12</sup>  
8  
9

10  
11  
12 The conceptual framework elaborated by the WHO Commission on Social Determinants of  
13  
14 Health <sup>4</sup> has summarized the social production of health and health inequities as follows: 1)  
15  
16 Social contexts, broadly interpreted to include the interlocking societal structures that shape the  
17  
18 distribution of resources within society, create social stratification by assigning individuals to  
19  
20 different social positions; 2) Social position shapes individuals' access and vulnerability to  
21  
22 intermediary determinants of health, which include principally material and psychosocial  
23  
24 circumstances, and secondarily behavioural and biological factors; 3) Systematic differences in  
25  
26 health emerge across the entire social spectrum in response to these differential exposures; and 4)  
27  
28 Poor health feeds back to exacerbate the subordinate social positions occupied by individuals,  
29  
30 perpetuating inter-generational cycles of marginalization and poor health, and affecting the  
31  
32 operation of social, political and economic institutions.  
33  
34  
35  
36  
37  
38  
39

40 Thus, whereas the social determinants of health encompass all of the social factors that shape  
41  
42 health collectively, the quality of the social determinants that individuals experience is governed  
43  
44 by their position within the social hierarchy, which we refer to hereafter as social position.<sup>12</sup>  
45  
46 Social position therefore marks the point where societal structures intersect with the lives of  
47  
48 individuals by shaping their unequal experiences of the social determinants of health, and in this  
49  
50 way constitutes a lynchpin mechanism through which health inequities are generated,  
51  
52 perpetuated and maintained.<sup>4 12 13</sup> Understanding how multiple layers of advantage and  
53  
54  
55  
56  
57  
58  
59  
60

1  
2  
3 disadvantage overlap, interact and are embodied across the life course within the construct of  
4  
5 'social position' is therefore central to understanding the social production of (ill) health and  
6  
7 corresponding points of intervention. While the terms social class, socioeconomic status, social  
8  
9 position and socioeconomic position are often used interchangeably, we designate social position  
10  
11 as the higher order, aggregate construct that reflects individuals' perceived and objective  
12  
13 placement within hierarchies of prestige, power and access to resources.<sup>14</sup>  
14  
15  
16  
17  
18

### 19 **(Re)Conceptualizing and operationalizing social position**

20  
21 Given that social position is a key mediator of health and health inequities, biomedically-based  
22  
23 conceptualizations of precision public health that largely ignore, or that relegate social position  
24  
25 to a subordinate role, offer limited potential to improve health. However, to redefine precision  
26  
27 public health by simply substituting social factors for biological and behavioural ones would fail  
28  
29 to mark precision public health as distinct from current public health practice. It would also  
30  
31 would miss the opportunity to consider whether social position might be more effectively  
32  
33 conceptualized and operationalized to advance health and health equity, and it is to this issue that  
34  
35 we now turn.  
36  
37  
38  
39  
40  
41

42 In modern liberal welfare states, individuals' attain different positions within the social hierarchy  
43  
44 according to factors such as level of income, educational attainment and occupation, and as such  
45  
46 many studies operationalize social position according to one or several of these objective  
47  
48 indicators, what we refer to as 'master categories.'<sup>4 15</sup> It is important that these indicators not be  
49  
50 conflated, however, as although they overlap, they also represent different structures of  
51  
52 inequality. For example, income is an indicator that most directly reflects access to material  
53  
54  
55  
56  
57  
58  
59  
60

1  
2  
3 resources (e.g. housing, food, clothing), whereas education closely reflects knowledge-related  
4  
5 assets and is a strong determinant of future employment and income.<sup>4 16</sup> That these three  
6  
7 categories should consistently be accorded greater significance relative to others in explaining  
8  
9 the patterning of health may be more a matter of convenience (i.e. the data are available) than an  
10  
11 evidence-based practice, and disregards other powerful dimensions of inequity. Indeed, common  
12  
13 measures of social position explain only a fraction of the structural inequities confronted by  
14  
15 racial/ethnic minorities.<sup>17</sup>  
16  
17  
18  
19  
20

21 Focusing on these unitary categories of difference to the exclusion of others or in isolation from  
22  
23 one another, as many studies do, may obscure understanding of the complexity of social position.  
24  
25 A more comprehensive perspective acknowledges social position as a context-specific social  
26  
27 construct that represents a mixture of these and other axes of social differentiation,<sup>15</sup> including  
28  
29 age, gender/sex, race/ethnicity, wealth, citizenship status, religion and disability.<sup>4</sup> Bourdieu's<sup>18</sup>  
30  
31 notions of economic, social and cultural capital are other aspects of social position that can  
32  
33 reflect, respectively, financial, relational and socially distinctive assets. Identity- and rank-based  
34  
35 perceptions of ones' own social position must also be considered,<sup>15</sup> and, because they entail a  
36  
37 reflective averaging of past and current statuses and future expectations,<sup>15 19 20</sup> may embody the  
38  
39 cumulative, combined and interactive effects of multiple dimensions of social position more  
40  
41 fully than objective indicators.  
42  
43  
44  
45  
46  
47  
48

49 In addition to expanding beyond master categories of social position, attending to the  
50  
51 heterogeneity within them may further improve understanding of health inequities by examining  
52  
53 individuals as persons whose experiences of health cannot be ascertained on the basis of any one  
54  
55  
56  
57

1  
2  
3 indicator.<sup>15 21</sup> Intersectionality theory uses the term social location to refer to the interplay among  
4 a variety of social determinants in shaping the unique social experiences of vulnerable groups. A  
5 key insight from this theoretical approach is that experiences of advantage and disadvantage are  
6 not merely additive in their effects.<sup>22</sup> Some groups experience more negative, and others more  
7 positive health effects than would be predicted on the basis of adding together their individual  
8 positions.<sup>22-24</sup> For instance, among Black women in the US with less than a high school  
9 education, being a Black woman has a negative effect on health beyond the main effects  
10 contributed by race, gender and other factors.<sup>22</sup> Notably, this effect disappears among Black  
11 women who attain a higher level of education.

12  
13  
14  
15  
16  
17  
18  
19  
20  
21  
22  
23  
24  
25  
26 What this example illustrates is that not only do inequities in the distribution of social resources  
27 correlate highly with race/ethnicity, education and gender/sex, but also that these inequities are  
28 enhanced through interactions among these factors.<sup>22</sup> That is, there is no prototypical experience  
29 of what it means to be a woman, instead, women experience their gender differently based on  
30 their position within other social structures of race/ethnicity, class, and others.<sup>24</sup> Dimensions of  
31 social position must therefore be interrogated in tandem, because it is at the nexus of these  
32 intersecting domains that a precise social identity is created whose health effects cannot be  
33 understood on the basis of its individual parts.<sup>25</sup> Failure to attend to these interactions may limit  
34 understanding of how the meanings of different dimensions of social position are mutually  
35 constituted, simultaneously experienced, and jointly associated with health, thereby yielding  
36 misleading results.<sup>26</sup>

1  
2  
3 Beyond considering its varied, mutually-constituted and reinforcing dimensions, there are many  
4 other ways in which social position could be operationalized in more precise ways to advance  
5 public health research. For instance, indicators of social position are often dichotomized (e.g. <  
6 high school education vs > high school education; White vs 'other'), which may obscure  
7 gradients across the entire social spectrum or for particular groups (e.g. racial/ethnic minorities)  
8 that might be uncovered by using more categories or continuous measures.<sup>21 27</sup> Studies may only  
9 consider quantitative aspects of social position (e.g. years of education), while neglecting its  
10 qualitative dimensions (e.g. quality of the education received),<sup>28</sup> or they may focus exclusively at  
11 the individual level and neglect factors at the contextual level (e.g. neighbourhood disadvantage)  
12 that may also be theoretically relevant.<sup>21</sup> Furthermore, given that social position is socially  
13 constructed, some axes of differentiation may be more salient in particular times and places. The  
14 health effects of social position should therefore be studied in particular historical moments and  
15 within particular social, political, geographic and economic contexts, including at the broader  
16 contextual level (e.g. year, nation) and specific to the life course (e.g. age, marital status, place of  
17 residence).<sup>21</sup> Yuval-Davis<sup>29</sup> has labelled these considerations translocality (how the meaning of  
18 social position varies by place), transcalarity (how the meaning of social position varies in small  
19 scale settings vs in higher level regions) and transtemporality (how the meaning of social  
20 position varies over time).

### 21 22 23 24 25 26 27 28 29 30 31 32 33 34 35 36 37 38 39 40 41 42 43 44 45 46 47 **Contextual pathways to social position**

48  
49 The purpose of expanding beyond master categories of social position and operationalizing these  
50 categories in more precise ways is to further understanding of the nature of health risk, the causal  
51 mechanisms at play, and ultimately identify potential points of intervention that are specific  
52  
53  
54  
55  
56  
57  
58  
59  
60

1  
2  
3 enough to be useful in reducing health inequities. Health inequities are generated within a  
4 sociopolitical context, including systems of governance, economic, social and public policies,  
5 culture and societal values.<sup>4</sup> These contextual factors create, configure and maintain patterns of  
6 social stratification by determining the manner in which power and resources are distributed  
7 amongst social groups. Thus, it is within the social context that the so-called ‘causes of the  
8 causes’ of health inequities ultimately reside.<sup>4</sup>  
9

10  
11 The identification of health inequities according to dimensions of social position (e.g.  
12 race/ethnicity and income) therefore provides an indication that exclusionary processes are at  
13 play (e.g. racial/ethnic segregation, inadequate minimum wage policies) that require further  
14 investigation. They can also prompt a search for inclusionary processes (e.g. opportunities for  
15 social interaction) that may buffer these same processes of marginalization. Therefore, just as the  
16 multi-faceted nature of social position requires precise quantification, so too do the broader  
17 macro level factors that structure them; and the role of the former is primarily to prompt and  
18 inform a more in-depth examination of the latter. By linking health inequities experienced by  
19 those occupying precise social positions to their precise social contexts, we can better consider  
20 causal pathways and begin to identify opportunities for intervention that address the root causes  
21 of these inequities. The interventions that arise from such analyses are likely to be more effective  
22 and efficient because they address specific sources of social differentiation.  
23  
24  
25  
26  
27  
28  
29  
30  
31  
32  
33  
34  
35  
36  
37  
38  
39  
40  
41  
42  
43  
44  
45  
46  
47  
48

49 A case in point concerns educational gradients in health in the US.<sup>28</sup> Although a gradient is  
50 evident in men and women<sup>30</sup> and among all racial/ethnic groups,<sup>31</sup> the incremental value of  
51 educational attainment appears strongest in women,<sup>32</sup> and non-Hispanic whites.<sup>33 34</sup> These  
52  
53  
54  
55  
56  
57

1  
2  
3 findings could prompt a search for educational processes responsible for these differential  
4  
5 outcomes, such as gendered teaching styles, or curricula that ignore colonialist practices. Such  
6  
7 analyses should also attend to the ways in which these institutional structures interact with one  
8  
9 another and with dimensions of social position to shape health, and how their health effects vary  
10  
11 over time. In this way, identification of heterogeneity in health outcomes can prompt a search for  
12  
13 the sources of this underlying heterogeneity, directing resources to the most pressing and  
14  
15 important contextual targets, particularly those that cut across positional categories.  
16  
17  
18  
19  
20

## 21 **A FRAMEWORK FOR PRECISION PUBLIC HEALTH**

### 22 **Reconceptualizing precision in public health**

23  
24 We have described social position and its complex and mutually constituted dimensions, along  
25  
26 with the contextual factors that generate, configure and maintain patterns of social stratification  
27  
28 as key targets for focused investigation, and have highlighted areas in which greater precision  
29  
30 might be achieved in order to more precisely identify dimensions of social position that confer  
31  
32 health risk, and the social contexts that configure them. We now use the preceding discussion as  
33  
34 a basis to outline a framework for precision public health that integrates personalized and  
35  
36 population-based approaches to population health improvement by focusing on social position as  
37  
38 a root cause of ill health, and operationalizing this construct in more precise ways. In this way,  
39  
40 the proposed framework affords potential for more effective intervention than both biomedically-  
41  
42 based notions of precision public health that do not address root causes, and current public health  
43  
44 research that homogenizes individuals' health experiences.  
45  
46  
47  
48  
49  
50  
51  
52  
53  
54  
55  
56  
57  
58  
59  
60

1  
2  
3 Central to the notion of precision in health is the concept of identifying specific risk factor  
4 profiles that confer vulnerability to poor health. Whereas precision medicine regards  
5 vulnerability as a function of biomedical and behavioural risks, vulnerability within a social  
6 determinants paradigm is an emergent process that unfolds across the life course in response to  
7 multiple and varied experiences of social privilege and marginalization in a variety of contexts.  
8 Thus, social position and its context-specific interacting dimensions, determinants, and health  
9 consequences constitute the central locus of study within a precision public health approach.  
10 That the context exerts its influence on health via social position marks both as important  
11 priorities of investigation. However, because the causes of health inequities originate within the  
12 social context, it is the context, rather than social position itself, that presents the most effective  
13 opportunities for intervention. A more fulsome and precise characterization of social position  
14 may more accurately pinpoint the origins of health inequities within the social context, enabling  
15 development of interventions that have a greater likelihood of success because they attend to the  
16 particular experiences and contexts of affected groups.  
17  
18  
19  
20  
21  
22  
23  
24  
25  
26  
27  
28  
29  
30  
31  
32  
33  
34  
35  
36  
37

38 We therefore propose that attention to social position reframes the practice and aims of precision  
39 public health to be:  
40  
41  
42  
43

44 *Precision public health investigates how multiple dimensions of social position interact to confer*  
45 *health risk differently for precisely defined population subgroups according to the social*  
46 *contexts in which they are embedded. It leverages this information to uncover the precise social*  
47 *structures and processes that pattern health outcomes, and to identify actionable interventions*  
48 *within the social contexts of affected groups.*  
49  
50  
51  
52  
53  
54  
55  
56  
57

## **OPERATIONALIZING PRECISION PUBLIC HEALTH IN RESEARCH TO INFORM PRACTICE**

Based on this definition and related substantive considerations, the accompanying Text Box proposes six recommendations for operationalizing a precision public health study from theoretical premise through identifying promising interventions. Precision should be sought in the areas that are the most theoretically meaningful within the context of each individual study, while acknowledging that a minimum of two should be implemented in tandem to constitute an instance of precision public health.

### **Use theory within a precision public health framework as a conceptual and operational guide to research**

Precision public health provides a framework for investigating the precise contextual pathways, mediated by social position, through which health inequities arise. This broader framework can accommodate theoretical and methodological diversity. For instance, precision public health studies could investigate materialist or psychosocial mechanisms underlying health inequities. Therefore, the starting point for precision public health studies is to articulate the hypothesized theoretical processes and experiences of social stratification at play. This theory can then provide a conceptual and operational guide for conducting the research, and in particular, to select meaningful social positions and contexts for study in relation to the health outcomes of interest.

Precision public health does not entail the study of all possible social position-social context combinations, but encourages scientists to attend to meaningful diversity within samples that

1  
2  
3 capture salient social experiences, while acknowledging the potential implications of excluding  
4 others.<sup>35</sup> A key consideration concerns whether all social positions are equally deserving of  
5 study, or only those that are associated with the greatest disadvantage.<sup>36</sup> Importantly, health  
6 inequities exist across the entire social spectrum,<sup>2 4 37 38</sup> and most populations will experience  
7 forms of advantage and disadvantage across the life course.<sup>36</sup> It is therefore important to  
8 understand how experiences of advantage and disadvantage interact to shape health in all social  
9 groups, and how they vary across place and time, to ensure a more comprehensive understanding  
10 of the social production of health. The acronym PROGRESS-PLUS<sup>39</sup> (Place of residence;  
11 Race/ethnicity/culture/language; Occupation; Gender/sex; Religion; Education; socioeconomic  
12 position and social capital; PLUS captures all other indicators of disadvantage) includes many  
13 indicators of disadvantage, and may be helpful in identifying salient social categories that  
14 interact.  
15  
16  
17  
18  
19  
20  
21  
22  
23  
24  
25  
26  
27  
28  
29  
30  
31  
32

### 33 **Identify the precise social positions and contexts of groups with systematically poorer** 34 **health relative to more advantaged groups** 35

36 Having developed a theory-informed research plan, analyses can then proceed to identify the  
37 precise social positions and contexts of groups with systematically poorer health relative to more  
38 advantaged groups.  
39  
40  
41  
42  
43  
44  
45  
46

47 A variety of methods, both existing and new, and bridging all three traditions – quantitative,  
48 qualitative and mixed - can contribute to precision public health analyses. Machine learning, in  
49 which machines learn from patterns in the data rather than being pre-programmed to follow a  
50 particular analytical routine, is among the most promising approaches for uncovering novel  
51  
52  
53  
54  
55  
56  
57

1  
2  
3 intersections worthy of further study. However, caution is required given the potential to  
4  
5 exacerbate existing inequities when data are missing or incomplete for some social groups.<sup>40</sup>  
6  
7 Other quantitative methods that can be adapted for precision public health applications span  
8  
9 traditional techniques (e.g. including interaction terms in regression analyses,<sup>22 41</sup> structural  
10  
11 equation modelling, and latent class,<sup>42</sup> mediation,<sup>43</sup> and path analysis), to the more novel and  
12  
13 complex (e.g. multilevel modelling,<sup>23</sup> signal detection models,<sup>44</sup> Chi-Square Automatic  
14  
15 Interaction Detection,<sup>45-47</sup> quantifying discriminatory accuracy,<sup>48</sup> agent-based modelling<sup>49</sup>).  
16  
17 Modelling approaches that explicitly allow consideration of multiplicative, rather than simply  
18  
19 additive positionalities, may be particularly helpful.<sup>22</sup> Situating the analyses in particular  
20  
21 historical and social moments, both to provide background for the reader, and when interpreting  
22  
23 findings, is essential. Methods such as qualitative comparative analyses<sup>50</sup> and multiple case  
24  
25 studies<sup>51</sup> that explicitly account for context may be particularly valuable in this respect, as can  
26  
27 longitudinal analyses that examine change in social positions in relation to change in health over  
28  
29 time. Marginalized groups that co-locate geographically may be subject to similar policy,  
30  
31 environmental and social exposures; and therefore area-based analyses to identify areas with a  
32  
33 high burden of disease, and/or where income inequality is high may help to identify contexts for  
34  
35 focused study.<sup>52</sup>  
36  
37  
38  
39  
40  
41  
42  
43  
44

45 Reconceptualizing constructs such as race/ethnicity and gender as social processes (i.e.  
46  
47 experiences of racism and sexism), rather than as characteristics of individuals may prove  
48  
49 valuable in helping to uncover structural causes of inequities, particularly those that cut across  
50  
51 intersections of social position.<sup>26 35</sup> Experimental techniques that manipulate subjective social  
52  
53 position<sup>53</sup> and that prime certain identities<sup>54</sup> are also promising. Finally, qualitative methods are  
54  
55  
56  
57  
58  
59  
60

1  
2  
3 well-suited to understanding the experience of health inequities and the social mechanisms that  
4 generate and configure them. In particular, phenomenology can provide an in-depth perspective  
5 of the lived experience of social position,<sup>55</sup> while ethnography can help to understand the  
6 collective cultures and norms of specific social groups from an 'emic' perspective.<sup>56</sup> These and  
7 other types of qualitative analyses can complement, supplement or triangulate quantitative  
8 analyses within mixed methods studies. Bauer<sup>36</sup> and Warner<sup>35</sup> have summarized a variety of  
9 intersectional methods that might also be adapted for precision public health applications.  
10  
11  
12  
13  
14  
15  
16  
17  
18  
19  
20  
21

### 22 **Knowledge-to-action: Precision public health in the real-world**

23  
24 The aims of precision public health will only be realized to the extent that findings are mobilized  
25 into real-world interventions that effectively address the social drivers of poor health and of  
26 health inequities. Current public health approaches to mitigating inequities primarily consist of  
27 universal programs and policies that operate across entire populations, and targeted approaches  
28 that direct attention to those considered to be the worst off.<sup>14</sup> Precision public health is most  
29 closely aligned with the notion of targeting, however the two are not synonymous, as in many  
30 cases, targeting problematizes the broad behavioural and social risk factor profiles of individuals,  
31 rather than the structural forces responsible for situating them within disadvantaged social  
32 contexts. Although limited progress is evident in some cases,<sup>57</sup> these programs and policies have  
33 largely proven incapable, on their own, of substantially reducing health inequities,<sup>58-63</sup> suggesting  
34 that new, complementary approaches may be needed.  
35  
36  
37  
38  
39  
40  
41  
42  
43  
44  
45  
46  
47  
48  
49  
50

51 Interventions formulated within a precision public health paradigm may represent one such  
52 complementary approach. Greater precision in formulating public health interventions may help  
53  
54  
55  
56  
57

1  
2  
3 to avoid creation of programs and policies that meaningfully apply to no one because they  
4 concern factors that shape the health of ‘average’ disadvantaged individuals who may not  
5 actually exist. Moreover, a precision public health approach appropriately targets social  
6 processes and contexts rather than high-risk individuals and groups, and seeks to directly alter  
7 these social processes and contexts rather than to simply mute the unhealthy effects of social  
8 position (i.e. an approach we liken to prescribing an ‘equitinol’ pill that dampens the  
9 pathophysiologic response to allostatic load (e.g. <sup>64</sup>)). Nevertheless, given that health is shaped  
10 by a chain of social processes, interventions of all types – universal, targeted and precise - and  
11 spanning all leverage points - upstream, midstream and downstream – are needed, and can  
12 complement one another.<sup>37 65-70</sup> Precision public health interventions might therefore be most  
13 usefully enacted within a reframed proportionate universalist approach whereby some  
14 interventions are universally provided, while others are targeted or precisely tailored to meet the  
15 needs of, and offset barriers to health encountered by vulnerable subgroups.<sup>71 72</sup> This approach  
16 integrates personalized and population strategies and modelling studies support its efficacy in  
17 reducing health inequities.<sup>73</sup> A precision public health lens also encourages attention to the  
18 effects of interventions on subgroups who are not the intended targets.

## 41 42 **DISCUSSION AND CONCLUSIONS**

43  
44 The renewed vision of precision public health presented herein endeavours to disrupt biomedical  
45 approaches to health and linear thinking that essentializes the health experiences of  
46 heterogeneous groups. Social position is an inherently dynamic social construct, consisting of  
47 mutually constituted objective and subjective components. It is precisely this complexity that  
48 most previous investigations have ignored, that we maintain may in fact be perpetuating health

1  
2  
3 inequities. Embracing this complexity through a precision public health approach may yield  
4  
5 considerable progress in improving health and reducing health inequities, but will require a  
6  
7 fundamental paradigm shift in the manner in which social position is conceptualized and  
8  
9 operationalized within research, and ultimately within practice (Table 1).  
10  
11  
12  
13

14 Health inequities constitute inequities in people's capacity to function and realize their full  
15  
16 potential, making them a priority for intervention within any just society. However, despite  
17  
18 attempts to eliminate them, health inequities persist and have even widened in some cases. If we  
19  
20 accept that health inequities are socially patterned, then it follows that their solutions must also  
21  
22 be. Current conceptualizations of precision public health based in a biomedical model of health  
23  
24 are therefore fundamentally incapable of yielding progress toward this end. Precision public  
25  
26 health is not simply precision medicine at a population level.  
27  
28  
29  
30  
31  
32

33 Health inequities may be driven by multiply marginalized populations who experience excess  
34  
35 health risk.<sup>21-23 41 74</sup> Expanding beyond master categories of social position, and operationalizing  
36  
37 these categories in more precise ways across place and time, can enrich public health research  
38  
39 through greater attention to the heterogeneity of social positions, their causes and health effects,  
40  
41 leading to identification of points of intervention that are specific enough to be useful in reducing  
42  
43 health inequities. Failure to attend to this level of particularity may mask the true nature of risk,  
44  
45 the causal mechanisms at play and the most appropriate interventions. Conceptualized thus,  
46  
47 precision public health is a research endeavour and an aspect of public health practice with much  
48  
49 to offer by way of understanding and intervening on the causes of poor health and health  
50  
51 inequities.  
52  
53  
54  
55  
56  
57  
58  
59  
60

### **Authors' contributions**

DLO and LM conceived of and wrote the paper. All authors read and approved the final manuscript.

### **Competing interests**

None.

### **Funding**

This study did not receive any specific grant from funding agencies in the public, commercial, or not-for-profit sectors.

### **Acknowledgements**

The authors wish to acknowledge helpful comments provided by Dr. Kim Raine on a draft version of this article.

### **License statement**

I, the Submitting Author has the right to grant and does grant on behalf of all authors of the Work (as defined in the below author licence), an exclusive licence and/or a non-exclusive licence for contributions from authors who are: i) UK Crown employees; ii) where BMJ has agreed a CC-BY licence shall apply, and/or iii) in accordance with the terms applicable for US Federal Government officers or employees acting as part of their official duties; on a worldwide, perpetual, irrevocable, royalty-free basis to BMJ Publishing Group Ltd ("BMJ") its licensees and where the relevant Journal is co-owned by BMJ to the co-owners of the Journal, to publish the Work in BMJ Open and any other BMJ products and to exploit all rights, as set out in our licence.

The Submitting Author accepts and understands that any supply made under these terms is made by BMJ to the Submitting Author unless you are acting as an employee on behalf of your

1  
2  
3 employer or a postgraduate student of an affiliated institution which is paying any applicable  
4 article publishing charge (“APC”) for Open Access articles. Where the Submitting Author  
5  
6  
7 wishes to make the Work available on an Open Access basis (and intends to pay the relevant  
8  
9  
10 APC), the terms of reuse of such Open Access shall be governed by a Creative Commons licence  
11  
12 – details of these licences and which Creative Commons licence will apply to this Work are set  
13  
14  
15 out in our licence referred to above.  
16  
17  
18  
19  
20  
21  
22  
23  
24  
25  
26  
27  
28  
29  
30  
31  
32  
33  
34  
35  
36  
37  
38  
39  
40  
41  
42  
43  
44  
45  
46  
47  
48  
49  
50  
51  
52  
53  
54  
55  
56  
57  
58  
59  
60

1  
2  
3 **Text Box 1: Recommendations for achieving greater precision in public health.** Precision  
4 should be sought in the areas that are the most theoretically meaningful within the context of  
5  
6 each individual study, while acknowledging that a minimum of two should be implemented in  
7  
8 tandem to constitute an instance of precision public health.  
9  
10

- 11  
12 1. Provide explicit and **precise descriptions of the theoretical rationale** underlying the  
13 selection and operationalization of social positions, social contexts, health outcomes, and  
14 potential confounders. **The proposed causal pathways should be precisely identified a**  
15  
16 **priori.**  
17  
18
- 19  
20 2. **Identify the precise social positions of populations of interest** and investigate their  
21 associations with health by expanding beyond common unitary categories to examine  
22 other dimensions of social position, and the heterogeneity that exists within social  
23 categories. Measures of **perceived social position** should be explored more fully.  
24  
25
- 26  
27 3. **Operationalize social position in more precise ways**, such as by using continuous  
28 measures or more categories, considering qualitative and quantitative features, and  
29 considering factors at multiple levels.  
30  
31
- 32  
33 4. **Describe the precise time and context of measurement of social position** and study the  
34 health effects of social position **in a variety of contexts and at multiple time points**  
35  
36 **across the life course.**  
37  
38
- 39  
40 5. Use **precise language to describe health inequities** (e.g. inequities in cardiovascular  
41 disease according to wealth and gender).  
42  
43
- 44  
45 6. Use knowledge of the health effects of individuals' precise social positions to inform the  
46 study of **precise contextual mechanisms** responsible for situating them there. Leverage  
47  
48 this information to propose **precise interventions** to ameliorate health inequities  
49  
50  
51  
52  
53  
54  
55  
56  
57

**Table 1 Reconceptualizing precision in public health**

| <b>Move away from...</b>                                                                     | <b>Move towards...</b>                                                                                                               |
|----------------------------------------------------------------------------------------------|--------------------------------------------------------------------------------------------------------------------------------------|
| Biomedical model of health                                                                   | Social determinants model of health                                                                                                  |
| The functions (e.g. surveillance) and methods (e.g. big data) of public health               | The foundations (e.g. social determinants) and core aims (e.g. improve population health, reduce health inequities) of public health |
| Unitary, master categories of objective social position (i.e. income, education, occupation) | Social position as a construct that is both objective and perceived through lived experiences                                        |
| Problematizing individuals and their behaviours                                              | Problematizing the social contexts that create social stratification                                                                 |
| Scaled-up versions of individual level interventions                                         | Interventions that address the root causes of health inequities                                                                      |
| Precision medicine for the population                                                        | Precision public health                                                                                                              |

## REFERENCES

1. CNN Politics. State of the Union 2015: Full transcript 2015 [Available from: <https://www.cnn.com/2015/01/20/politics/state-of-the-union-2015-transcript-full-text/index.html> accessed June 15, 2018.
2. Marmot MG, Rose G, Shipley M, et al. Employment grade and coronary heart disease in British civil servants. *J Epidemiol Community Health* 1978;32(4):244-9.
3. Marmot MG, Smith GD, Stansfeld S, et al. Health inequalities among British civil servants: the Whitehall II study. *Lancet* 1991;337(8754):1387-93. [published Online First: 1991/06/08]
4. Commission on Social Determinants of Health. CSDH final report: closing the gap in a generation: health equity through action on the social determinants of health Geneva: World Health Organization; 2008 [Available from: [http://www.who.int/social\\_determinants/publications/commission/en/](http://www.who.int/social_determinants/publications/commission/en/) accessed November 11, 2017.
5. Adler NE, Boyce WT, Chesney MA, et al. Socioeconomic inequalities in health. No easy solution. *JAMA : the journal of the American Medical Association* 1993;269(24):3140-5. [published Online First: 1993/06/23]
6. Weeramanthri TS, Dawkins HJS, Baynam G, et al. Editorial: Precision public health. *Frontiers in Public Health* 2018;6:1-3.
7. Khoury MJ, Iademarco MF, Riley WT. Precision Public Health for the Era of Precision Medicine. *Am J Prev Med* 2016;50(3):398-401. doi: 10.1016/j.amepre.2015.08.031
8. Khoury MJ, Galea S. Will Precision Medicine Improve Population Health? *JAMA : the journal of the American Medical Association* 2016;316(13):1357-58. doi: 10.1001/jama.2016.12260 [published Online First: 2016/08/20]
9. Dowell SF, Blazes D, Desmond-Hellman S. Four steps to precision public health. *Nature* 2016;540:189-91.
10. Ramaswami R, Bayer R, Galea S. Precision Medicine from a Public Health Perspective. *Annu Rev Public Health* 2018;39:153-68. doi: 10.1146/annurev-publhealth-040617-014158 [published Online First: 2017/11/23]
11. Evangelatos N, Satyamoorthy K, Brand A. Personalized health in a public health perspective. *International journal of public health* 2018;63(4):433-34. doi: 10.1007/s00038-017-1055-5 [published Online First: 2017/11/12]
12. Graham H. Social determinants and their unequal distribution: clarifying policy understandings. *Milbank Q* 2004;82(1):101-24.
13. Link BG, Phelan J. Social conditions as fundamental causes of disease. *Journal of health and social behavior* 1995;Spec No:80-94. [published Online First: 1995/01/01]
14. Graham H, Kelly MP. Health inequalities: concepts, frameworks and policy: NHS Health Development Agency; 2004 [Available from: [http://admin.nice.org.uk/niceMedia/pdf/health\\_inequalities\\_policy\\_graham.pdf](http://admin.nice.org.uk/niceMedia/pdf/health_inequalities_policy_graham.pdf) accessed June 15, 2018.
15. Loignon AC, Woehr DJ. Social class in the organizational sciences: A conceptual integration and meta-analytic review. *Journal of Management* 2017;epub ahead of print Sept 19, 2017:1-28.
16. Galobardes B, Shaw M, Lawlor DA, et al. Indicators of socioeconomic position (part 1). *J Epidemiol Community Health* 2006;60(1):7-12. doi: 10.1136/jech.2004.023531

17. Nuru-Jeter AM, Michaels EK, Thomas MD, et al. Relative Roles of Race Versus Socioeconomic Position in Studies of Health Inequalities: A Matter of Interpretation. *Annu Rev Public Health* 2018;39:169-88. doi: 10.1146/annurev-publhealth-040617-014230 [published Online First: 2018/01/13]
18. Bourdieu P. *Distinction: A social critique of the judgment of taste*. Cambridge, MA: Harvard College 1984.
19. Singh-Manoux A, Adler NE, Marmot MG. Subjective social status: its determinants and its association with measures of ill-health in the Whitehall II study. *Soc Sci Med* 2003;56(6):1321-33. [published Online First: 2003/02/26]
20. Andersson MA. How do we assign ourselves social status? A cross-cultural test of the cognitive averaging principle. *Soc Sci Res* 2015;52:317-29. doi: 10.1016/j.ssresearch.2015.02.009 [published Online First: 2015/05/26]
21. Braveman PA, Cubbin C, Egerter S, et al. Socioeconomic status in health research: one size does not fit all. *JAMA : the journal of the American Medical Association* 2005;294(22):2879-88. doi: 10.1001/jama.294.22.2879 [published Online First: 2005/12/15]
22. Hinze SW, Lin J, Andersson TE. Can we capture the intersections? Older Black women, education, and health. *Womens Health Issues* 2012;22(1):e91-8. doi: 10.1016/j.whi.2011.08.002 [published Online First: 2011/10/11]
23. Evans CR, Williams DR, Onnela JP, et al. A multilevel approach to modeling health inequalities at the intersection of multiple social identities. *Soc Sci Med* 2017 doi: 10.1016/j.socscimed.2017.11.011 [published Online First: 2017/12/05]
24. Veenstra G. Race, gender, class, and sexual orientation: intersecting axes of inequality and self-rated health in Canada. *International journal for equity in health* 2011;10:3. doi: 10.1186/1475-9276-10-3 [published Online First: 2011/01/19]
25. Hankivsky O, Christoffersen A. Intersectionality and the determinants of health: a Canadian perspective. *Critical Public Health* 2008;18(3):271-83.
26. Cole ER. Intersectionality and research in psychology. *American Psychologist* 2009;64(3):170-80.
27. Altman DG, Royston P. The cost of dichotomising continuous variables. *BMJ* 2006;332(7549):1080. doi: 10.1136/bmj.332.7549.1080 [published Online First: 2006/05/06]
28. Zajacova A, Lawrence EM. The Relationship Between Education and Health: Reducing Disparities Through a Contextual Approach. *Annu Rev Public Health* 2018;39:273-89. doi: 10.1146/annurev-publhealth-031816-044628 [published Online First: 2018/01/13]
29. Yuval-Davis N. Situated intersectionality and social inequality. *Presses de Sciences PO* 2015;58:91-100.
30. Zajacova A. Education, gender, and mortality: does schooling have the same effect on mortality for men and women in the US? *Soc Sci Med* 2006;63(8):2176-90. doi: 10.1016/j.socscimed.2006.04.031 [published Online First: 2006/06/20]
31. Cutler D, Lleras-Muney A. Education and health: evaluating theories and evidence. In: Schoeni R, House JS, Kaplan GA, et al., eds. *Making americans healthier: Social and economic policy as health policy*. New York: Russell Sage Foundation 2008:29-60.
32. Ross CE, Masters R, Hummer RA. Education and the gender gaps in health and mortality. *Demography* 2012 49:1157-83.

- 1
- 2
- 3
- 4 33. Williams DR, Collins C. US socioeconomic and racial differences in health: patterns and
- 5 explanations. *Annual Reviews in Sociology* 1995 21:349-86.
- 6 34. Williams DR, Jackson PB. Social sources of racial disparities in health. *Health Aff*
- 7 *(Millwood)* 2005;24(2):325-34. doi: 10.1377/hlthaff.24.2.325 [published Online First:
- 8 2005/03/11]
- 9 35. Warner LR. A best practices guide to intersectional approaches in psychological research.
- 10 *Sex Roles* 2008;59:454-63.
- 11 36. Bauer GR. Incorporating intersectionality theory into population health research
- 12 methodology: challenges and the potential to advance health equity. *Soc Sci Med*
- 13 2014;110:10-7. doi: 10.1016/j.socscimed.2014.03.022
- 14 37. Graham H. Tackling inequalities in health in England: Remedying health disadvantages,
- 15 narrowing health gaps or reducing health gradients? *Journal of Social Policy*
- 16 2004;33(1):115-31.
- 17 38. Adler NE, Boyce T, Chesney MA, et al. Socioeconomic status and health. The challenge of
- 18 the gradient. *The American psychologist* 1994;49(1):15-24. [published Online First:
- 19 1994/01/01]
- 20 39. O'Neill J, Tabish H, Welch V, et al. Applying an equity lens to interventions: using
- 21 PROGRESS ensures consideration of socially stratifying factors to illuminate inequities
- 22 in health. *Journal of clinical epidemiology* 2014;67(1):56-64. doi:
- 23 10.1016/j.jclinepi.2013.08.005
- 24 40. Gianfrancesco MA, Tamang S, Yazdany J, et al. Potential Biases in Machine Learning
- 25 Algorithms Using Electronic Health Record Data. *JAMA Intern Med* 2018 doi:
- 26 10.1001/jamainternmed.2018.3763 [published Online First: 2018/08/22]
- 27 41. Abichahine H, Veenstra G. Inter-categorical intersectionality and leisure-based physical
- 28 activity in Canada. *Health Promot Int* 2017;32(4):691-701. doi: 10.1093/heapro/daw009
- 29 [published Online First: 2016/03/16]
- 30 42. Garnett BR, Masyn KE, Austin SB, et al. The intersectionality of discrimination attributes
- 31 and bullying among youth: an applied latent class analysis. *J Youth Adolesc*
- 32 2014;43(8):1225-39. doi: 10.1007/s10964-013-0073-8 [published Online First:
- 33 2013/12/10]
- 34 43. Seng JS, Lopez WD, Sperlich M, et al. Marginalized identities, discrimination burden, and
- 35 mental health: empirical exploration of an interpersonal-level approach to modeling
- 36 intersectionality. *Soc Sci Med* 2012;75(12):2437-45. doi:
- 37 10.1016/j.socscimed.2012.09.023 [published Online First: 2012/10/24]
- 38 44. Winkleby MA, Flora JA, Kraemer HC. A community-based heart disease intervention:
- 39 predictors of change. *Am J Public Health* 1994;84(5):767-72. [published Online First:
- 40 1994/05/01]
- 41 45. Frank LD, Kerr J, Sallis JF, et al. A hierarchy of sociodemographic and environmental
- 42 correlates of walking and obesity. *Prev Med* 2008;47(2):172-8. doi:
- 43 10.1016/j.ypmed.2008.04.004 [published Online First: 2008/06/21]
- 44 46. Wewers ME, Salsberry PJ, Ferketich AK, et al. Risk factors for smoking in rural women. *J*
- 45 *Womens Health (Larchmt)* 2012;21(5):548-56. doi: 10.1089/jwh.2011.3183 [published
- 46 Online First: 2012/03/01]
- 47 47. Lakerveld J, Loyen A, Schotman N, et al. Sitting too much: A hierarchy of socio-
- 48 demographic correlates. *Prev Med* 2017;101:77-83. doi: 10.1016/j.ypmed.2017.05.015
- 49 [published Online First: 2017/05/30]
- 50
- 51
- 52
- 53
- 54
- 55
- 56
- 57
- 58
- 59
- 60

- 1  
2  
3 48. Mulinari S, Wemrell M, Ronnerstrand B, et al. Categorical and anti-categorical approaches to  
4 US racial/ethnic groupings: revisiting the National 2009 H1N1 Flu Survey (NHFS).  
5 *Critical Public Health* 2017;1-13.  
6  
7 49. Ip EH, Rahmandad H, Shoham DA, et al. Reconciling statistical and systems science  
8 approaches to public health. *Health Educ Behav* 2013;40(1 Suppl):123S-31S. doi:  
9 10.1177/1090198113493911 [published Online First: 2013/10/23]  
10  
11 50. Blackman T. Exploring Explanations for Local Reductions in Teenage Pregnancy Rates in  
12 England: An Approach Using Qualitative Comparative Analysis. *Soc Policy Soc*  
13 2013;12(1):61-72. doi: 10.1017/S1474746412000358 [published Online First:  
14 2014/01/01]  
15  
16 51. Valentine G. Theorizing and Researching Intersectionality: A Challenge for Feminist  
17 Geography. *The Professional Geographer* 2007;59(1):10-21.  
18  
19 52. Campbell M, Ballas D. SimAlba: A Spatial Microsimulation Approach to the Analysis of  
20 Health Inequalities. *Front Public Health* 2016;4:230. doi: 10.3389/fpubh.2016.00230  
21 [published Online First: 2016/11/08]  
22  
23 53. Pavela G, Lewis DW, Dawson JA, et al. Social status and energy intake: a randomized  
24 controlled experiment. *Clin Obes* 2017;7(5):316-22. doi: 10.1111/cob.12198 [published  
25 Online First: 2017/09/07]  
26  
27 54. Shih M, Pittinsky TL, Ambady N. Stereotype susceptibility: Identity salience and shifts in  
28 quantitative performance. *Psychological science* 1999;10(1):80-83.  
29  
30 55. Sokolowski R. Introduction to phenomenology. Cambridge, UK: Cambridge University Press  
31 2000.  
32  
33 56. Agar M. The professional stranger. San Diego, CA: Academic Press 1996.  
34  
35 57. Barr B, Higgerson J, Whitehead M. Investigating the impact of the English health  
36 inequalities strategy: time trend analysis. *Bmj-Brit Med J* 2017;358 doi: ARTN j3310  
37 10.1136/bmj.j3310  
38  
39 58. Mackenbach JP. Has the English strategy to reduce health inequalities failed? *Soc Sci Med*  
40 2010;71(7):1249-53; discussion 54-8. doi: 10.1016/j.socscimed.2010.07.014  
41  
42 59. Mackenbach JP. The persistence of health inequalities in modern welfare states: the  
43 explanation of a paradox. *Soc Sci Med* 2012;75(4):761-9. doi:  
44 10.1016/j.socscimed.2012.02.031  
45  
46 60. Mackenbach JP. Nordic paradox, Southern miracle, Eastern disaster: persistence of  
47 inequalities in mortality in Europe. *European journal of public health*  
48 2017;27(suppl\_4):14-17. doi: 10.1093/eurpub/ckx160 [published Online First:  
49 2017/10/14]  
50  
51 61. Mackenbach JP, Bos V, Andersen O, et al. Widening socioeconomic inequalities in mortality  
52 in six Western European countries. *Int J Epidemiol* 2003;32(5):830-7.  
53  
54 62. Olstad DL, Ancilotto R, Teychenne M, et al. Can targeted policies reduce obesity and  
55 improve obesity-related behaviours in socioeconomically disadvantaged populations? A  
56 systematic review. *Obes Rev* 2017;18(7):791-807. doi: 10.1111/obr.12546 [published  
57 Online First: 2017/04/24]  
58  
59 63. Olstad DL, Teychenne M, Minaker LM, et al. Can policy ameliorate socioeconomic  
60 inequities in obesity and obesity-related behaviours? A systematic review of the impact  
of universal policies on adults and children. *Obes Rev* 2016;17(12):1198-217. doi:  
10.1111/obr.12457

- 1  
2  
3  
4  
5  
6  
7  
8  
9  
10  
11  
12  
13  
14  
15  
16  
17  
18  
19  
20  
21  
22  
23  
24  
25  
26  
27  
28  
29  
30  
31  
32  
33  
34  
35  
36  
37  
38  
39  
40  
41  
42  
43  
44  
45  
46  
47  
48  
49  
50  
51  
52  
53  
54  
55  
56  
57  
58  
59  
60
64. Beckie TM. A systematic review of allostatic load, health, and health disparities. *Biol Res Nurs* 2012;14(4):311-46. doi: 10.1177/1099800412455688 [published Online First: 2012/09/26]
  65. Carey G, Crammond B. A glossary of policy frameworks: the many forms of 'universalism' and policy 'targeting'. *J Epidemiol Community Health* 2017;71(3):303-07. doi: 10.1136/jech-2014-204311 [published Online First: 2014/10/09]
  66. Frohlich KL, Potvin L. Transcending the known in public health practice: the inequality paradox: the population approach and vulnerable populations. *Am J Public Health* 2008;98(2):216-21. doi: 10.2105/AJPH.2007.114777
  67. McLaren L, McIntyre L, Kirkpatrick S. Rose's population strategy of prevention need not increase social inequalities in health. *Int J Epidemiol* 2010;39(2):372-7. doi: 10.1093/ije/dyp315
  68. Pearson-Stuttard J, Bandosz P, Rehm CD, et al. Reducing US cardiovascular disease burden and disparities through national and targeted dietary policies: A modelling study. *PLoS Med* 2017;14(6):e1002311. doi: 10.1371/journal.pmed.1002311 [published Online First: 2017/06/07]
  69. Platt JM, Keyes KM, Galea S. Efficiency or equity? Simulating the impact of high-risk and population intervention strategies for the prevention of disease. *SSM Population Health* 2017;3:1-8.
  70. Rose G. Sick individuals and sick populations. *Int J Epidemiol* 1985;14(1):32-8. [published Online First: 1985/03/01]
  71. Carey G, Crammond B, De Leeuw E. Towards health equity: a framework for the application of proportionate universalism. *International journal for equity in health* 2015;14:81. doi: 10.1186/s12939-015-0207-6 [published Online First: 2015/09/16]
  72. Marmot M, Allen J, Goldblatt P, et al. The Marmot Review. Fair Society, Health Lives 2010 [Available from: <http://www.instituteofhealthequity.org/resources-reports/fair-society-healthy-lives-the-marmot-review/fair-society-healthy-lives-full-report-pdf.pdf> accessed March 6 2019.
  73. Kypridemos C, Allen K, Hickey GL, et al. Cardiovascular screening to reduce the burden from cardiovascular disease: microsimulation study to quantify policy options. *BMJ* 2016;353:i2793. doi: 10.1136/bmj.i2793 [published Online First: 2016/06/10]
  74. Hargrove TW. Intersecting Social Inequalities and Body Mass Index Trajectories from Adolescence to Early Adulthood. *Journal of health and social behavior* 2018;59(1):56-73. doi: 10.1177/0022146517746672 [published Online First: 2018/01/05]

# BMJ Open

## Reconceptualizing precision public health

|                                 |                                                                                                                                    |
|---------------------------------|------------------------------------------------------------------------------------------------------------------------------------|
| Journal:                        | <i>BMJ Open</i>                                                                                                                    |
| Manuscript ID                   | bmjopen-2019-030279.R2                                                                                                             |
| Article Type:                   | Communication                                                                                                                      |
| Date Submitted by the Author:   | 20-Jun-2019                                                                                                                        |
| Complete List of Authors:       | Olstad, Dana; University of Calgary Cumming School of Medicine<br>Mcintyre, Lynn; University of Calgary Cumming School of Medicine |
| <b>Primary Subject Heading</b>: | Public health                                                                                                                      |
| Secondary Subject Heading:      | Health policy                                                                                                                      |
| Keywords:                       | Precision public health, Social determinants of health, Health inequities, Social position                                         |
|                                 |                                                                                                                                    |

SCHOLARONE™  
Manuscripts

1  
2  
3 **Title:** Reconceptualizing precision public health  
4  
5  
6  
7

8 **Authors:** Dana Lee Olstad, Lynn McIntyre  
9  
10  
11

12 **Affiliation:** Department of Community Health Sciences, Cumming School of Medicine,  
13  
14 University of Calgary, 3280 Hospital Drive NW, Calgary, Alberta T2N 2Z6 Canada  
15  
16  
17  
18

19 **Email addresses:** [dana.olsstad@ucalgary.ca](mailto:dana.olsstad@ucalgary.ca); [lmcintyr@ucalgary.ca](mailto:lmcintyr@ucalgary.ca)  
20  
21  
22  
23

24 **Corresponding author:** Dr. Dana Lee Olstad, 3280 Hospital Drive NW, Calgary, Alberta T2N  
25  
26 2Z6 Canada; [dana.olsstad@ucalgary.ca](mailto:dana.olsstad@ucalgary.ca); +01 403-210-8673  
27  
28  
29  
30  
31  
32  
33  
34  
35  
36  
37  
38  
39  
40  
41  
42  
43  
44  
45  
46  
47  
48  
49  
50  
51  
52  
53  
54  
55  
56  
57  
58  
59  
60

## ABSTRACT

As it is currently conceived, precision public health is at risk of becoming precision medicine at a population level. This paper outlines a framework for precision public health that, in contrast to its current operationalization, is consistent with public health principles, and integrates personalized and population-based approaches. We review the conceptual foundations of public health, outline a proposed framework for precision public health, and describe its operationalization within research and practice. Social position shapes individuals' unequal experiences of the social determinants of health. Thus, in our formulation, precision public health investigates how multiple dimensions of social position interact to confer health risk differently for precisely defined population subgroups according to the social contexts in which they are embedded, while considering relevant biological and behavioural factors. It leverages this information to uncover the precise and intersecting social structures and processes that pattern health outcomes, and to identify actionable interventions within the social contexts of affected groups. We contend that studies informed by this framework offer greater potential to improve health than current conceptualizations of precision public health which do not address root causes. Moreover, expanding beyond master categories of social position (i.e. income, education, occupation) and operationalizing these categories in more precise ways across place and time can enrich public health research through greater attention to the heterogeneity of social positions, their causes and health effects, leading to identification of points of intervention that are specific enough to be useful in reducing health inequities. Failure to attend to this level of particularity may mask the true nature of health risk, the causal mechanisms at play and the most appropriate interventions. Conceptualized thus, precision public health is a research endeavour

1  
2  
3 with much to offer by way of understanding and intervening on the causes of poor health and  
4  
5 health inequities.  
6  
7  
8  
9

10 **Keywords:** Precision public health; Social determinants of health; Health inequities; Social  
11  
12 position; Social context  
13  
14  
15  
16  
17  
18  
19  
20  
21  
22  
23  
24  
25  
26  
27  
28  
29  
30  
31  
32  
33  
34  
35  
36  
37  
38  
39  
40  
41  
42  
43  
44  
45  
46  
47  
48  
49  
50  
51  
52  
53  
54  
55  
56  
57  
58  
59  
60

For peer review only

## INTRODUCTION

### From precision medicine to precision public health

In January 2015, US President Barack Obama boldly proclaimed that precision medicine would radically transform health by tailoring treatment and prevention to the biological risk profile of the individual patient.<sup>1</sup> These individualized medical interventions would emerge from analyzing data in large biobanks, sequencing more genomes and linking biological information to electronic health records. Efforts are now underway worldwide to achieve this aim. The idea that better health might be achieved through such approaches is consistent with a biomedical model of health which posits that health is primarily a product of individual biological (e.g. genetics, age, sex) and behavioural risk factors (e.g. dietary intake, physical activity, sleep patterns). Despite the dominance of this model within modern medical practice, evidence indicates that these individual level risk factors account for limited variation in disease risk at a population level.<sup>2,3</sup> Instead, differences in health status appear to be largely attributable to the living conditions individuals encounter on a daily basis, and cumulatively over their life course.<sup>4</sup>

Regardless of whether precision medicine succeeds in tailoring treatment to the biological risk profiles of individual patients, because of the limited explanatory power of individual level risk factors, it cannot on its own yield the promised transformations in ill health at a population level. Imagine that John Snow had applied the tools of precision medicine during the 1854 cholera outbreak. He may have advised his countrymen to seek treatment individualized to their genetic susceptibility, or advised those at highest risk to alter their health behaviours. Instead, by simply removing the handle of the Broad Street pump, Snow changed the social conditions in which residents lived, preventing them from becoming sick in the first place. There must be a balance

1  
2  
3 between attention to individual biological and behavioural risk factors, and the avoidable risk  
4 factors for disease that arise from the conditions of daily life. Moreover, interventions based in a  
5 biomedical model of health remain fundamentally agnostic on the subject of health inequities,  
6 and to the extent that access to care is often greater for those with greater means,<sup>5</sup> may even  
7 exacerbate them.  
8  
9  
10  
11  
12  
13

### 14 15 16 17 **Current conceptualizations of precision public health**

18  
19 Initially proposed in Australia in 2013 as a complement to the precision medicine initiative,<sup>6</sup>  
20 precision public health has been variously characterized as “providing the right intervention to  
21 the right population at the right time”,<sup>7</sup> and “applying emerging methods and technologies for  
22 measuring disease, pathogens, exposures, behaviors, and susceptibility in populations to improve  
23 health”,<sup>8</sup> among others. Big data and informatics are central to most definitions, and indeed  
24 some suggest that the use of such data are the defining feature of a precision public health  
25 approach.<sup>6,9</sup> Priority actions centre upon collecting data from large, diverse samples, amassing  
26 unbiased genetic and environmental data, education, public health-health care partnerships, early  
27 detection especially through genome sequencing, and enhancing public health surveillance and  
28 tracking.<sup>7,9</sup> It has further been suggested that the aims of precision medicine and public health  
29 might be reconciled through scaling-up precision medicine approaches to whole populations,<sup>6</sup>  
30 and by incorporating information on environmental and socioeconomic factors into precision  
31 medicine analyses.<sup>10</sup>  
32  
33  
34  
35  
36  
37  
38  
39  
40  
41  
42  
43  
44  
45  
46  
47  
48  
49  
50

51 It therefore appears that, as currently conceived, precision public health is precision medicine  
52 scaled-up to a population level, often through leveraging big data, the science of ‘omics’ and  
53  
54  
55  
56  
57

1  
2  
3 other technological advancements.<sup>11</sup> Noticeably absent from this body of literature is focused  
4  
5 attention to foundational public health concepts such as social position, the social determinants  
6  
7 of health and health inequities, nor to their political and social origins, meanings and  
8  
9 implications. That the modern conception of precision public health should be so heavily rooted  
10  
11 in a biomedical paradigm of health is antithetical to the very foundations of public health, and  
12  
13 points to a need to both enlarge the scope of, and refocus current definitions on core public  
14  
15 health concepts.  
16  
17  
18  
19  
20

## 21 **Objectives**

22  
23 The purpose of this paper is to posit a precision public health approach that expands upon and  
24  
25 refocuses current definitions on the social causation of health and health inequities. We offer a  
26  
27 renewed vision for precision public health that places social position and its context-specific  
28  
29 interacting dimensions, determinants, and health consequences at the heart of study, and seeks to  
30  
31 study these with greater precision in order to identify points of intervention that are specific  
32  
33 enough to be useful in reducing health inequities. In this way, the framework offers a means to  
34  
35 integrate personalized and population-based approaches to prevention. We argue that the  
36  
37 proposed framework may offer greater potential to improve health and reduce health inequities  
38  
39 than primarily biomedically-based notions of precision public health that do not address root  
40  
41 causes, and public health as currently practiced which, although it addresses root causes, does so  
42  
43 in a homogenizing way. We begin with a brief review of the conceptual foundations of public  
44  
45 health, then present a case for more precise attention to social position within a reconceptualized  
46  
47 framework for precision public health, and describe its operationalization within research and  
48  
49 practice.  
50  
51  
52  
53  
54  
55  
56  
57  
58  
59  
60

## CONCEPTUAL FOUNDATIONS OF PUBLIC HEALTH

### **Social determinants of health**

The social determinants of health encompass the conditions of daily life in which individuals are born, grow, live, work and age, including features associated with their early childhood, employment grade, housing conditions, incomes, experiences of discrimination, neighbourhood environments and level of education.<sup>4</sup> Individual biology and health behaviours are included, but occupy a less prominent role. That the quality of social conditions should so fundamentally shape the health of individuals and populations was perhaps most convincingly demonstrated by the Whitehall Studies of British civil servants, whereby it was shown that health declined with each step down the social ladder, even among a group of relatively well-paid individuals with stable employment, and for whom health care was provided as a matter of right.<sup>2</sup> The 2008 report of the WHO Commission on the Social Determinants of Health synthesized evidence on the social determinants of health into a coherent framework and agenda for action.<sup>4</sup> A key contribution was its acknowledgment that addressing the social determinants of health implies a joint attack on both the social causes of poor health and health inequities.

### **Health inequities and social position**

Health inequities are systematic differences in health between groups occupying unequal positions within society.<sup>4</sup> These differences are not merely a problem between the extremes of the continuum, but are evident across the entire social gradient. Health inequities are a consequence of societal structures that distribute resources, power and prestige according to factors such as income, education, occupation, and others.<sup>4</sup> While the term health inequalities

1  
2  
3 refers to differences in health, the concept of inequities invokes a moral judgement that these  
4 differences are unfair because they are potentially avoidable. Inherent within a social  
5  
6 determinants perspective is the need to attend to both the social factors that shape the health of  
7  
8 individuals and populations, and the social processes that govern their social patterning.<sup>4 12</sup>  
9

10  
11  
12  
13  
14 The conceptual framework elaborated by the WHO Commission on Social Determinants of  
15 Health <sup>4</sup> has summarized the social production of health and health inequities as follows: 1)  
16  
17 Social contexts, broadly interpreted to include the interlocking societal structures that shape the  
18  
19 distribution of resources within society, create social stratification by assigning individuals to  
20  
21 different social positions; 2) Social position shapes individuals' access and vulnerability to  
22  
23 intermediary determinants of health, which include principally material and psychosocial  
24  
25 circumstances, and secondarily behavioural and biological factors; 3) Systematic differences in  
26  
27 health emerge across the entire social spectrum in response to these differential exposures; and 4)  
28  
29 Poor health feeds back to exacerbate the subordinate social positions occupied by individuals,  
30  
31 perpetuating inter-generational cycles of marginalization and poor health, and affecting the  
32  
33 operation of social, political and economic institutions.  
34  
35  
36  
37  
38  
39  
40  
41

42 Thus, whereas the social determinants of health encompass all of the social factors that shape  
43  
44 health collectively, the quality of the social determinants that individuals experience is governed  
45  
46 by their position within the social hierarchy, which we refer to hereafter as social position.<sup>12</sup>  
47  
48 Social position therefore marks the point where societal structures intersect with the lives of  
49  
50 individuals by shaping their unequal experiences of the social determinants of health, and in this  
51  
52 way constitutes a lynchpin mechanism through which health inequities are generated,  
53  
54  
55  
56  
57

1  
2  
3 perpetuated and maintained.<sup>4 12 13</sup> Understanding how multiple layers of advantage and  
4  
5 disadvantage overlap, interact and are embodied across the life course within the construct of  
6  
7 ‘social position’ is therefore central to understanding the social production of (ill) health and  
8  
9 corresponding points of intervention. While the terms social class, socioeconomic status, social  
10  
11 position and socioeconomic position are often used interchangeably, we designate social position  
12  
13 as the higher order, aggregate construct that reflects individuals’ perceived and objective  
14  
15 placement within hierarchies of prestige, power and access to resources.<sup>14</sup>  
16  
17  
18  
19  
20

### 21 **(Re)Conceptualizing and operationalizing social position**

22  
23 Given that social position is a key mediator of health and health inequities, primarily  
24  
25 biomedically-based conceptualizations of precision public health that largely ignore, or that  
26  
27 relegate social position to a subordinate role, offer limited potential to improve health. However,  
28  
29 to redefine precision public health by simply substituting social factors for biological and  
30  
31 behavioural ones would fail to mark precision public health as distinct from current public health  
32  
33 practice. It would also would miss the opportunity to consider whether social position might be  
34  
35 more effectively conceptualized and operationalized to advance health and health equity, and it is  
36  
37 to this issue that we now turn.  
38  
39  
40  
41  
42  
43

44  
45 In modern liberal welfare states, individuals’ attain different positions within the social hierarchy  
46  
47 according to factors such as level of income, educational attainment and occupation, and as such  
48  
49 many studies operationalize social position according to one or several of these objective  
50  
51 indicators, what we refer to as ‘master categories.’<sup>14 15</sup> It is important that these indicators not be  
52  
53 conflated, however, as although they overlap, they also represent different structures of  
54  
55  
56  
57

1  
2  
3 inequality. For example, income is an indicator that most directly reflects access to material  
4 resources (e.g. housing, food, clothing), whereas education closely reflects knowledge-related  
5 assets and is a strong determinant of future employment and income.<sup>4 16</sup> That these three  
6 categories should consistently be accorded greater significance relative to others in explaining  
7 the patterning of health may be more a matter of convenience (i.e. the data are available) than an  
8 evidence-based practice, and disregards other powerful dimensions of inequity. Indeed, common  
9 measures of social position explain only a fraction of the structural inequities confronted by  
10 racial/ethnic minorities.<sup>17</sup>

11  
12  
13  
14  
15  
16  
17  
18  
19  
20  
21  
22  
23  
24 Focusing on these unitary categories of difference to the exclusion of others or in isolation from  
25 one another, as many studies do, may obscure understanding of the complexity of social position.  
26 A more comprehensive perspective acknowledges social position as a context-specific social  
27 construct that represents a mixture of these and other axes of social differentiation,<sup>15</sup> including  
28 age, gender/sex, race/ethnicity, wealth, citizenship status, religion and disability.<sup>4</sup> Bourdieu's<sup>18</sup>  
29 notions of economic, social and cultural capital are other aspects of social position that can  
30 reflect, respectively, financial, relational and socially distinctive assets. Identity- and rank-based  
31 perceptions of ones' own social position must also be considered,<sup>15</sup> and, because they entail a  
32 reflective averaging of past and current statuses and future expectations,<sup>15 19 20</sup> may embody the  
33 cumulative, combined and interactive effects of multiple dimensions of social position more  
34 fully than objective indicators.

35  
36  
37  
38  
39  
40  
41  
42  
43  
44  
45  
46  
47  
48  
49  
50  
51 In addition to expanding beyond master categories of social position, attending to the  
52 heterogeneity within them may further improve understanding of health inequities by examining  
53  
54  
55  
56  
57

1  
2  
3 individuals as persons whose experiences of health cannot be ascertained on the basis of any one  
4  
5 indicator.<sup>15 21</sup> Intersectionality theory uses the term social location to refer to the interplay among  
6  
7 a variety of social determinants in shaping the unique social experiences of vulnerable groups. A  
8  
9 key insight from this theoretical approach is that experiences of advantage and disadvantage are  
10  
11 not merely additive in their effects.<sup>22</sup> Some groups experience more negative, and others more  
12  
13 positive health effects than would be predicted on the basis of adding together their individual  
14  
15 positions.<sup>22-24</sup> For instance, among Black women in the US with less than a high school  
16  
17 education, being a Black woman has a negative effect on health beyond the main effects  
18  
19 contributed by race, gender and other factors.<sup>22</sup> Notably, this effect disappears among Black  
20  
21 women who attain a higher level of education.  
22  
23  
24  
25  
26  
27

28 What this example illustrates is that not only do inequities in the distribution of social resources  
29  
30 correlate highly with race/ethnicity, education and gender/sex, but also that these inequities are  
31  
32 enhanced through interactions among these factors.<sup>22</sup> That is, there is no prototypical experience  
33  
34 of what it means to be a woman, instead, women experience their gender differently based on  
35  
36 their position within other social structures of race/ethnicity, class, and others.<sup>24</sup> Dimensions of  
37  
38 social position must therefore be interrogated in tandem, because it is at the nexus of these  
39  
40 intersecting domains that a precise social identity is created whose health effects cannot be  
41  
42 understood on the basis of its individual parts.<sup>25</sup> Failure to attend to these interactions may limit  
43  
44 understanding of how the meanings of different dimensions of social position are mutually  
45  
46 constituted, simultaneously experienced, and jointly associated with health, thereby yielding  
47  
48 misleading results.<sup>26</sup>  
49  
50  
51  
52  
53  
54  
55  
56  
57  
58  
59  
60

1  
2  
3 Beyond considering its varied, mutually-constituted and reinforcing dimensions, there are many  
4 other ways in which social position could be operationalized in more precise ways to advance  
5 public health research. For instance, indicators of social position are often dichotomized (e.g. <  
6 high school education vs > high school education; White vs 'other'), which may obscure  
7 gradients across the entire social spectrum or for particular groups (e.g. racial/ethnic minorities)  
8 that might be uncovered by using more categories or continuous measures.<sup>21 27</sup> Studies may only  
9 consider quantitative aspects of social position (e.g. years of education), while neglecting its  
10 qualitative dimensions (e.g. quality of the education received),<sup>28</sup> or they may focus exclusively at  
11 the individual level and neglect factors at the contextual level (e.g. neighbourhood disadvantage)  
12 that may also be theoretically relevant.<sup>21</sup> Furthermore, given that social position is socially  
13 constructed, some axes of differentiation may be more salient in particular times and places. The  
14 health effects of social position should therefore be studied in particular historical moments and  
15 within particular social, political, geographic and economic contexts, including at the broader  
16 contextual level (e.g. year, nation) and specific to the life course (e.g. age, marital status, place of  
17 residence).<sup>21</sup> Yuval-Davis<sup>29</sup> has labelled these considerations translocality (how the meaning of  
18 social position varies by place), transcalarity (how the meaning of social position varies in small  
19 scale settings vs in higher level regions) and transtemporality (how the meaning of social  
20 position varies over time).

### 21 22 23 24 25 26 27 28 29 30 31 32 33 34 35 36 37 38 39 40 41 42 43 44 45 46 47 **Contextual pathways to social position**

48  
49 The purpose of expanding beyond master categories of social position and operationalizing these  
50 categories in more precise ways is to further understanding of the nature of health risk, the causal  
51 mechanisms at play, and ultimately identify potential points of intervention that are specific  
52  
53  
54  
55  
56  
57  
58  
59  
60

1  
2  
3 enough to be useful in reducing health inequities. Health inequities are generated within a  
4 sociopolitical context, including systems of governance, economic, social and public policies,  
5 culture and societal values.<sup>4</sup> These contextual factors create, configure and maintain patterns of  
6 social stratification by determining the manner in which power and resources are distributed  
7 amongst social groups. Thus, it is within the social context that the so-called ‘causes of the  
8 causes’ of health inequities ultimately reside.<sup>4</sup>  
9

10  
11  
12  
13  
14  
15  
16  
17  
18  
19 The identification of health inequities according to dimensions of social position (e.g.  
20 race/ethnicity and income) therefore provides an indication that exclusionary processes are at  
21 play (e.g. racial/ethnic segregation, inadequate minimum wage policies) that require further  
22 investigation. They can also prompt a search for inclusionary processes (e.g. opportunities for  
23 social interaction) that may buffer these same processes of marginalization. Therefore, just as the  
24 multi-faceted nature of social position requires precise quantification, so too do the broader  
25 macro level factors that structure them; and the role of the former is primarily to prompt and  
26 inform a more in-depth examination of the latter. By linking health inequities experienced by  
27 those occupying precise social positions to their precise social contexts, we can better consider  
28 causal pathways and begin to identify opportunities for intervention that address the root causes  
29 of these inequities. The interventions that arise from such analyses are likely to be more effective  
30 and efficient because they address specific sources of social differentiation.  
31  
32  
33  
34  
35  
36  
37  
38  
39  
40  
41  
42  
43  
44  
45  
46  
47  
48

49 A case in point concerns educational gradients in health in the US.<sup>28</sup> Although a gradient is  
50 evident in men and women<sup>30</sup> and among all racial/ethnic groups,<sup>31</sup> the incremental value of  
51 educational attainment appears strongest in women,<sup>32</sup> and non-Hispanic whites.<sup>33 34</sup> These  
52  
53  
54  
55  
56  
57

1  
2  
3 findings could prompt a search for educational processes responsible for these differential  
4  
5 outcomes, such as gendered teaching styles, or curricula that ignore colonialist practices. Such  
6  
7 analyses should also attend to the ways in which these institutional structures interact with one  
8  
9 another and with dimensions of social position to shape health, and how their health effects vary  
10  
11 over time. In this way, identification of heterogeneity in health outcomes can prompt a search for  
12  
13 the sources of this underlying heterogeneity, directing resources to the most pressing and  
14  
15 important contextual targets, particularly those that cut across positional categories.  
16  
17  
18  
19  
20

## 21 **A FRAMEWORK FOR PRECISION PUBLIC HEALTH**

### 22 **Reconceptualizing precision in public health**

23  
24 We have described social position and its complex and mutually constituted dimensions, along  
25  
26 with the contextual factors that generate, configure and maintain patterns of social stratification  
27  
28 as key targets for focused investigation, and have highlighted areas in which greater precision  
29  
30 might be achieved in order to more precisely identify dimensions of social position that confer  
31  
32 health risk, and the social contexts that configure them. We now use the preceding discussion as  
33  
34 a basis to outline a framework for precision public health that integrates personalized and  
35  
36 population-based approaches to population health improvement by focusing on social position as  
37  
38 a root cause of ill health, and operationalizing this construct in more precise ways. In this way,  
39  
40 the proposed framework affords potential for more effective intervention than primarily  
41  
42 biomedically-based notions of precision public health that do not address root causes, and current  
43  
44 public health research that homogenizes individuals' health experiences.  
45  
46  
47  
48  
49  
50  
51  
52  
53  
54  
55  
56  
57  
58  
59  
60

1  
2  
3 Central to the notion of precision in health is the concept of identifying specific risk factor  
4 profiles that confer vulnerability to poor health. Whereas precision medicine regards  
5 vulnerability primarily as a function of biomedical and behavioural risks, vulnerability within a  
6 social determinants paradigm is an emergent process that unfolds across the life course in  
7 response to multiple and varied experiences of social privilege and marginalization in a variety  
8 of contexts. Thus, social position and its context-specific interacting dimensions, determinants,  
9 and health consequences constitute the central locus of study within a precision public health  
10 approach, while considering relevant biological and behavioural factors. That the context exerts  
11 its influence on health via social position marks both as important priorities of investigation.  
12 However, because the causes of health inequities originate within the social context, it is the  
13 context, rather than social position itself, that presents the most effective opportunities for  
14 intervention. A more fulsome and precise characterization of social position may more  
15 accurately pinpoint the origins of health inequities within the social context, enabling  
16 development of interventions that have a greater likelihood of success because they attend to the  
17 particular experiences and contexts of affected groups.  
18  
19  
20  
21  
22  
23  
24  
25  
26  
27  
28  
29  
30  
31  
32  
33  
34  
35  
36  
37  
38  
39

40 We therefore propose that attention to social position reframes the practice and aims of precision  
41 public health to be:  
42  
43  
44  
45  
46

47 *Precision public health investigates how multiple dimensions of social position interact to confer*  
48 *health risk differently for precisely defined population subgroups according to the social*  
49 *contexts in which they are embedded, while considering relevant biological and behavioural*  
50 *factors. It leverages this information to uncover the precise social structures and processes that*  
51  
52  
53  
54  
55  
56  
57

1  
2  
3 *pattern health outcomes, and to identify actionable interventions within the social contexts of*  
4  
5 *affected groups.*  
6  
7  
8  
9

## 10 **OPERATIONALIZING PRECISION PUBLIC HEALTH IN RESEARCH TO INFORM** 11 12 **PRACTICE** 13

14 Based on this definition and related substantive considerations, the accompanying Text Box  
15 proposes six recommendations for operationalizing a precision public health study from  
16 theoretical premise through identifying promising interventions. Precision should be sought in  
17 the areas that are the most theoretically meaningful within the context of each individual study,  
18 while acknowledging that a minimum of two should be implemented in tandem to constitute an  
19 instance of precision public health.  
20  
21  
22  
23  
24  
25  
26  
27  
28  
29

### 30 **Use theory within a precision public health framework as a conceptual and operational** 31 **guide to research** 32 33

34 Precision public health provides a framework for investigating the precise contextual pathways,  
35 mediated by social position, through which health inequities arise. This broader framework can  
36 accommodate theoretical and methodological diversity. For instance, precision public health  
37 studies could investigate materialist or psychosocial mechanisms underlying health inequities.  
38 Therefore, the starting point for precision public health studies is to articulate the hypothesized  
39 theoretical processes and experiences of social stratification at play. This theory can then  
40 provide a conceptual and operational guide for conducting the research, and in particular, to  
41 select meaningful social positions and contexts for study in relation to the health outcomes of  
42 interest.  
43  
44  
45  
46  
47  
48  
49  
50  
51  
52  
53  
54  
55  
56  
57  
58  
59  
60

1  
2  
3  
4  
5 Precision public health does not entail the study of all possible social position-social context  
6 combinations, but encourages scientists to attend to meaningful diversity within samples that  
7 capture salient social experiences, while acknowledging the potential implications of excluding  
8 others.<sup>35</sup> A key consideration concerns whether all social positions are equally deserving of  
9 study, or only those that are associated with the greatest disadvantage.<sup>36</sup> Importantly, health  
10 inequities exist across the entire social spectrum,<sup>2 4 37 38</sup> and most populations will experience  
11 forms of advantage and disadvantage across the life course.<sup>36</sup> It is therefore important to  
12 understand how experiences of advantage and disadvantage interact to shape health in all social  
13 groups, and how they vary across place and time, to ensure a more comprehensive understanding  
14 of the social production of health. The acronym PROGRESS-PLUS<sup>39</sup> (Place of residence;  
15 Race/ethnicity/culture/language; Occupation; Gender/sex; Religion; Education; socioeconomic  
16 position and social capital; PLUS captures all other indicators of disadvantage) includes many  
17 indicators of disadvantage, and may be helpful in identifying salient social categories that  
18 interact.  
19  
20  
21  
22  
23  
24  
25  
26  
27  
28  
29  
30  
31  
32  
33  
34  
35  
36  
37  
38  
39

#### 40 **Identify the precise social positions and contexts of groups with systematically poorer** 41 **health relative to more advantaged groups** 42 43

44 Having developed a theory-informed research plan, analyses can then proceed to identify the  
45 precise social positions and contexts of groups with systematically poorer health relative to more  
46 advantaged groups.  
47  
48  
49  
50  
51  
52  
53  
54  
55  
56  
57

1  
2  
3 A variety of methods, both existing and new, and bridging all three traditions – quantitative,  
4 qualitative and mixed - can contribute to precision public health analyses. Machine learning, in  
5  
6 which machines learn from patterns in the data rather than being pre-programmed to follow a  
7  
8 particular analytical routine, is among the most promising approaches for uncovering novel  
9  
10 intersections worthy of further study. However, caution is required given the potential to  
11  
12 exacerbate existing inequities when data are missing or incomplete for some social groups.<sup>40</sup>  
13  
14 Other quantitative methods that can be adapted for precision public health applications span  
15  
16 traditional techniques (e.g. including interaction terms in regression analyses,<sup>22 41</sup> structural  
17  
18 equation modelling, and latent class,<sup>42</sup> mediation,<sup>43</sup> and path analysis), to the more novel and  
19  
20 complex (e.g. multilevel modelling,<sup>23</sup> signal detection models,<sup>44</sup> Chi-Square Automatic  
21  
22 Interaction Detection,<sup>45-47</sup> quantifying discriminatory accuracy,<sup>48</sup> agent-based modelling<sup>49</sup>).  
23  
24 Modelling approaches that explicitly allow consideration of multiplicative, rather than simply  
25  
26 additive positionalities, may be particularly helpful.<sup>22</sup> Situating the analyses in particular  
27  
28 historical and social moments, both to provide background for the reader, and when interpreting  
29  
30 findings, is essential. Methods such as qualitative comparative analyses<sup>50</sup> and multiple case  
31  
32 studies<sup>51</sup> that explicitly account for context may be particularly valuable in this respect, as can  
33  
34 longitudinal analyses that examine change in social positions in relation to change in health over  
35  
36 time. Marginalized groups that co-locate geographically may be subject to similar policy,  
37  
38 environmental and social exposures; and therefore area-based analyses to identify areas with a  
39  
40 high burden of disease, and/or where income inequality is high may help to identify contexts for  
41  
42 focused study.<sup>52</sup>  
43  
44  
45  
46  
47  
48  
49  
50  
51  
52  
53  
54  
55  
56  
57  
58  
59  
60

1  
2  
3 Reconceptualizing constructs such as race/ethnicity and gender as social processes (i.e.  
4 experiences of racism and sexism), rather than as characteristics of individuals may prove  
5 valuable in helping to uncover structural causes of inequities, particularly those that cut across  
6 intersections of social position.<sup>26 35</sup> Experimental techniques that manipulate subjective social  
7 position<sup>53</sup> and that prime certain identities<sup>54</sup> are also promising. Finally, qualitative methods are  
8 well-suited to understanding the experience of health inequities and the social mechanisms that  
9 generate and configure them. In particular, phenomenology can provide an in-depth perspective  
10 of the lived experience of social position,<sup>55</sup> while ethnography can help to understand the  
11 collective cultures and norms of specific social groups from an 'emic' perspective.<sup>56</sup> These and  
12 other types of qualitative analyses can complement, supplement or triangulate quantitative  
13 analyses within mixed methods studies. Bauer<sup>36</sup> and Warner<sup>35</sup> have summarized a variety of  
14 intersectional methods that might also be adapted for precision public health applications.  
15  
16  
17  
18  
19  
20  
21  
22  
23  
24  
25  
26  
27  
28  
29  
30  
31  
32

### 33 **Knowledge-to-action: Precision public health in the real-world**

34  
35 The aims of precision public health will only be realized to the extent that findings are mobilized  
36 into real-world interventions that effectively address the social drivers of poor health and of  
37 health inequities. Current public health approaches to mitigating inequities primarily consist of  
38 universal programs and policies that operate across entire populations, and targeted approaches  
39 that direct attention to those considered to be the worst off.<sup>14</sup> Precision public health is most  
40 closely aligned with the notion of targeting, however the two are not synonymous, as in many  
41 cases, targeting problematizes the broad behavioural and social risk factor profiles of individuals,  
42 rather than the structural forces responsible for situating them within disadvantaged social  
43 contexts. Although limited progress is evident in some cases,<sup>57</sup> these programs and policies have  
44  
45  
46  
47  
48  
49  
50  
51  
52  
53  
54  
55  
56  
57  
58  
59  
60

1  
2  
3 largely proven incapable, on their own, of substantially reducing health inequities,<sup>58-63</sup> suggesting  
4 that new, complementary approaches may be needed.  
5  
6  
7  
8  
9

10 Interventions formulated within a precision public health paradigm may represent one such  
11 complementary approach. Greater precision in formulating public health interventions may help  
12 to avoid creation of programs and policies that meaningfully apply to no one because they  
13 concern factors that shape the health of ‘average’ disadvantaged individuals who may not  
14 actually exist. Moreover, a precision public health approach appropriately targets social  
15 processes and contexts rather than high-risk individuals and groups, and seeks to directly alter  
16 these social processes and contexts rather than to simply mute the unhealthy effects of social  
17 position (i.e. an approach we liken to prescribing an ‘equitinol’ pill that dampens the  
18 pathophysiologic response to allostatic load (e.g. <sup>64</sup>)). Nevertheless, given that health is shaped  
19 by a chain of social processes, interventions of all types – universal, targeted and precise - and  
20 spanning all leverage points - upstream, midstream and downstream – are needed, and can  
21 complement one another.<sup>37 65-70</sup> Precision public health interventions might therefore be most  
22 usefully enacted within a reframed proportionate universalist approach whereby some  
23 interventions are universally provided, while others are targeted or precisely tailored to meet the  
24 needs of, and offset barriers to health encountered by vulnerable subgroups.<sup>71 72</sup> This approach  
25 integrates personalized and population strategies and modelling studies support its efficacy in  
26 reducing health inequities.<sup>73</sup> A precision public health lens also encourages attention to the  
27 effects of interventions on subgroups who are not the intended targets.  
28  
29  
30  
31  
32  
33  
34  
35  
36  
37  
38  
39  
40  
41  
42  
43  
44  
45  
46  
47  
48  
49  
50  
51  
52  
53

## 54 **DISCUSSION AND CONCLUSIONS**

55  
56  
57  
58  
59  
60

1  
2  
3 The renewed vision of precision public health presented herein endeavours to disrupt biomedical  
4 approaches to health and linear thinking that essentializes the health experiences of  
5  
6 heterogeneous groups. Social position is an inherently dynamic social construct, consisting of  
7  
8 mutually constituted objective and subjective components. It is precisely this complexity that  
9  
10 most previous investigations have ignored, that we maintain may in fact be perpetuating health  
11  
12 inequities. Embracing this complexity through a precision public health approach may yield  
13  
14 considerable progress in improving health and reducing health inequities, but will require a  
15  
16 fundamental paradigm shift in the manner in which social position is conceptualized and  
17  
18 operationalized within research, and ultimately within practice (Table 1).  
19  
20  
21  
22  
23  
24  
25

26 Health inequities constitute inequities in people's capacity to function and realize their full  
27  
28 potential, making them a priority for intervention within any just society. However, despite  
29  
30 attempts to eliminate them, health inequities persist and have even widened in some cases. If we  
31  
32 accept that health inequities are socially patterned, then it follows that their solutions must also  
33  
34 be. Current conceptualizations of precision public health based primarily in a biomedical model  
35  
36 of health cannot therefore, on their own, yield significant progress toward this end. Precision  
37  
38 public health is not simply precision medicine at a population level, and therefore its definition  
39  
40 must illuminate social position as a determinant of health and health inequities.  
41  
42  
43  
44  
45  
46

47 Some might question whether the term 'precision public health' is even necessary. We believe  
48  
49 that 'precision' may be a valuable addition to the public health lexicon because it signals a  
50  
51 departure from the conventional public health paradigm by drawing attention to the  
52  
53 heterogeneity of social position. Health inequities may be driven by multiply marginalized  
54  
55  
56  
57

1  
2  
3 populations who experience excess health risk.<sup>21-23 41 74</sup> It is precisely this complexity that most  
4  
5 previous investigations have ignored, that we maintain may be perpetuating health inequities.  
6  
7 Expanding beyond master categories of social position, and operationalizing these categories in  
8  
9 more precise ways across place and time, can enrich conventional public health research through  
10  
11 greater attention to the heterogeneity of social positions, their causes and health effects, leading  
12  
13 to identification of points of intervention that are specific enough to be useful in reducing health  
14  
15 inequities. Failure to attend to this level of particularity may mask the true nature of risk, the  
16  
17 causal mechanisms at play and the most appropriate interventions. Conceptualized thus,  
18  
19 precision public health is a research endeavour and an aspect of public health practice with much  
20  
21 to offer by way of understanding and intervening on the causes of poor health and health  
22  
23 inequities.  
24  
25  
26  
27  
28  
29  
30

### 31 **Authors' contributions**

32  
33 DLO and LM conceived of and wrote the paper. All authors read and approved the final  
34  
35 manuscript.  
36

### 37 **Competing interests**

38  
39 None.  
40  
41

### 42 **Funding**

43  
44 This study did not receive any specific grant from funding agencies in the public, commercial, or  
45  
46 not-for-profit sectors.  
47  
48

### 49 **Acknowledgements**

50  
51 The authors wish to acknowledge helpful comments provided by Dr. Kim Raine on a draft  
52  
53 version of this article.  
54  
55  
56  
57

### License statement

I, the Submitting Author has the right to grant and does grant on behalf of all authors of the Work (as defined in the below author licence), an exclusive licence and/or a non-exclusive licence for contributions from authors who are: i) UK Crown employees; ii) where BMJ has agreed a CC-BY licence shall apply, and/or iii) in accordance with the terms applicable for US Federal Government officers or employees acting as part of their official duties; on a worldwide, perpetual, irrevocable, royalty-free basis to BMJ Publishing Group Ltd (“BMJ”) its licensees and where the relevant Journal is co-owned by BMJ to the co-owners of the Journal, to publish the Work in BMJ Open and any other BMJ products and to exploit all rights, as set out in our licence.

The Submitting Author accepts and understands that any supply made under these terms is made by BMJ to the Submitting Author unless you are acting as an employee on behalf of your employer or a postgraduate student of an affiliated institution which is paying any applicable article publishing charge (“APC”) for Open Access articles. Where the Submitting Author wishes to make the Work available on an Open Access basis (and intends to pay the relevant APC), the terms of reuse of such Open Access shall be governed by a Creative Commons licence – details of these licences and which Creative Commons licence will apply to this Work are set out in our licence referred to above.

1  
2  
3 **Text Box 1: Recommendations for achieving greater precision in public health.** Precision  
4 should be sought in the areas that are the most theoretically meaningful within the context of  
5  
6 each individual study, while acknowledging that a minimum of two should be implemented in  
7  
8 tandem to constitute an instance of precision public health.  
9  
10

- 11  
12 1. Provide explicit and **precise descriptions of the theoretical rationale** underlying the  
13 selection and operationalization of social positions, social contexts, health outcomes, and  
14 potential confounders. **The proposed causal pathways should be precisely identified a**  
15  
16 **priori.**  
17  
18
- 19  
20 2. **Identify the precise social positions of populations of interest** and investigate their  
21 associations with health by expanding beyond common unitary categories to examine  
22 other dimensions of social position, and the heterogeneity that exists within social  
23 categories. Measures of **perceived social position** should be explored more fully.  
24  
25
- 26  
27 3. **Operationalize social position in more precise ways**, such as by using continuous  
28 measures or more categories, considering qualitative and quantitative features, and  
29 considering factors at multiple levels.  
30  
31
- 32  
33 4. **Describe the precise time and context of measurement of social position** and study the  
34 health effects of social position **in a variety of contexts and at multiple time points**  
35  
36 **across the life course.**  
37  
38
- 39  
40 5. Use **precise language to describe health inequities** (e.g. inequities in cardiovascular  
41 disease according to wealth and gender).  
42  
43
- 44  
45 6. Use knowledge of the health effects of individuals' precise social positions to inform the  
46 study of **precise contextual mechanisms** responsible for situating them there. Leverage  
47  
48 this information to propose **precise interventions** to ameliorate health inequities  
49  
50  
51  
52  
53  
54  
55  
56  
57

**Table 1 Reconceptualizing precision in public health**

| <b>Move away from...</b>                                                                     | <b>Move towards...</b>                                                                                                               |
|----------------------------------------------------------------------------------------------|--------------------------------------------------------------------------------------------------------------------------------------|
| Biomedical model of health                                                                   | Social determinants model of health                                                                                                  |
| The functions (e.g. surveillance) and methods (e.g. big data) of public health               | The foundations (e.g. social determinants) and core aims (e.g. improve population health, reduce health inequities) of public health |
| Unitary, master categories of objective social position (i.e. income, education, occupation) | Social position as a construct that is both objective and perceived through lived experiences                                        |
| Problematizing individuals and their behaviours                                              | Problematizing the social contexts that create social stratification                                                                 |
| Scaled-up versions of individual level interventions                                         | Interventions that address the root causes of health inequities                                                                      |
| Precision medicine for the population                                                        | Precision public health                                                                                                              |

## REFERENCES

1. CNN Politics. State of the Union 2015: Full transcript 2015 [Available from: <https://www.cnn.com/2015/01/20/politics/state-of-the-union-2015-transcript-full-text/index.html> accessed June 15, 2018.
2. Marmot MG, Rose G, Shipley M, et al. Employment grade and coronary heart disease in British civil servants. *J Epidemiol Community Health* 1978;32(4):244-9.
3. Marmot MG, Smith GD, Stansfeld S, et al. Health inequalities among British civil servants: the Whitehall II study. *Lancet* 1991;337(8754):1387-93. [published Online First: 1991/06/08]
4. Commission on Social Determinants of Health. CSDH final report: closing the gap in a generation: health equity through action on the social determinants of health Geneva: World Health Organization; 2008 [Available from: [http://www.who.int/social\\_determinants/publications/commission/en/](http://www.who.int/social_determinants/publications/commission/en/) accessed November 11, 2017.
5. Adler NE, Boyce WT, Chesney MA, et al. Socioeconomic inequalities in health. No easy solution. *JAMA : the journal of the American Medical Association* 1993;269(24):3140-5. [published Online First: 1993/06/23]
6. Weeramanthri TS, Dawkins HJS, Baynam G, et al. Editorial: Precision public health. *Frontiers in Public Health* 2018;6:1-3.
7. Khoury MJ, Iademarco MF, Riley WT. Precision Public Health for the Era of Precision Medicine. *Am J Prev Med* 2016;50(3):398-401. doi: 10.1016/j.amepre.2015.08.031
8. Khoury MJ, Galea S. Will Precision Medicine Improve Population Health? *JAMA : the journal of the American Medical Association* 2016;316(13):1357-58. doi: 10.1001/jama.2016.12260 [published Online First: 2016/08/20]
9. Dowell SF, Blazes D, Desmond-Hellman S. Four steps to precision public health. *Nature* 2016;540:189-91.
10. Ramaswami R, Bayer R, Galea S. Precision Medicine from a Public Health Perspective. *Annu Rev Public Health* 2018;39:153-68. doi: 10.1146/annurev-publhealth-040617-014158 [published Online First: 2017/11/23]
11. Evangelatos N, Satyamoorthy K, Brand A. Personalized health in a public health perspective. *International journal of public health* 2018;63(4):433-34. doi: 10.1007/s00038-017-1055-5 [published Online First: 2017/11/12]
12. Graham H. Social determinants and their unequal distribution: clarifying policy understandings. *Milbank Q* 2004;82(1):101-24.
13. Link BG, Phelan J. Social conditions as fundamental causes of disease. *Journal of health and social behavior* 1995;Spec No:80-94. [published Online First: 1995/01/01]
14. Graham H, Kelly MP. Health inequalities: concepts, frameworks and policy: NHS Health Development Agency; 2004 [Available from: [http://admin.nice.org.uk/niceMedia/pdf/health\\_inequalities\\_policy\\_graham.pdf](http://admin.nice.org.uk/niceMedia/pdf/health_inequalities_policy_graham.pdf) accessed June 15, 2018.
15. Loignon AC, Woehr DJ. Social class in the organizational sciences: A conceptual integration and meta-analytic review. *Journal of Management* 2017;epub ahead of print Sept 19, 2017:1-28.
16. Galobardes B, Shaw M, Lawlor DA, et al. Indicators of socioeconomic position (part 1). *J Epidemiol Community Health* 2006;60(1):7-12. doi: 10.1136/jech.2004.023531

17. Nuru-Jeter AM, Michaels EK, Thomas MD, et al. Relative Roles of Race Versus Socioeconomic Position in Studies of Health Inequalities: A Matter of Interpretation. *Annu Rev Public Health* 2018;39:169-88. doi: 10.1146/annurev-publhealth-040617-014230 [published Online First: 2018/01/13]
18. Bourdieu P. *Distinction: A social critique of the judgment of taste*. Cambridge, MA: Harvard College 1984.
19. Singh-Manoux A, Adler NE, Marmot MG. Subjective social status: its determinants and its association with measures of ill-health in the Whitehall II study. *Soc Sci Med* 2003;56(6):1321-33. [published Online First: 2003/02/26]
20. Andersson MA. How do we assign ourselves social status? A cross-cultural test of the cognitive averaging principle. *Soc Sci Res* 2015;52:317-29. doi: 10.1016/j.ssresearch.2015.02.009 [published Online First: 2015/05/26]
21. Braveman PA, Cubbin C, Egerter S, et al. Socioeconomic status in health research: one size does not fit all. *JAMA : the journal of the American Medical Association* 2005;294(22):2879-88. doi: 10.1001/jama.294.22.2879 [published Online First: 2005/12/15]
22. Hinze SW, Lin J, Andersson TE. Can we capture the intersections? Older Black women, education, and health. *Womens Health Issues* 2012;22(1):e91-8. doi: 10.1016/j.whi.2011.08.002 [published Online First: 2011/10/11]
23. Evans CR, Williams DR, Onnela JP, et al. A multilevel approach to modeling health inequalities at the intersection of multiple social identities. *Soc Sci Med* 2017 doi: 10.1016/j.socscimed.2017.11.011 [published Online First: 2017/12/05]
24. Veenstra G. Race, gender, class, and sexual orientation: intersecting axes of inequality and self-rated health in Canada. *International journal for equity in health* 2011;10:3. doi: 10.1186/1475-9276-10-3 [published Online First: 2011/01/19]
25. Hankivsky O, Christoffersen A. Intersectionality and the determinants of health: a Canadian perspective. *Critical Public Health* 2008;18(3):271-83.
26. Cole ER. Intersectionality and research in psychology. *American Psychologist* 2009;64(3):170-80.
27. Altman DG, Royston P. The cost of dichotomising continuous variables. *BMJ* 2006;332(7549):1080. doi: 10.1136/bmj.332.7549.1080 [published Online First: 2006/05/06]
28. Zajacova A, Lawrence EM. The Relationship Between Education and Health: Reducing Disparities Through a Contextual Approach. *Annu Rev Public Health* 2018;39:273-89. doi: 10.1146/annurev-publhealth-031816-044628 [published Online First: 2018/01/13]
29. Yuval-Davis N. Situated intersectionality and social inequality. *Presses de Sciences PO* 2015;58:91-100.
30. Zajacova A. Education, gender, and mortality: does schooling have the same effect on mortality for men and women in the US? *Soc Sci Med* 2006;63(8):2176-90. doi: 10.1016/j.socscimed.2006.04.031 [published Online First: 2006/06/20]
31. Cutler D, Lleras-Muney A. Education and health: evaluating theories and evidence. In: Schoeni R, House JS, Kaplan GA, et al., eds. *Making americans healthier: Social and economic policy as health policy*. New York: Russell Sage Foundation 2008:29-60.
32. Ross CE, Masters R, Hummer RA. Education and the gender gaps in health and mortality. *Demography* 2012 49:1157-83.

- 1
- 2
- 3
- 4 33. Williams DR, Collins C. US socioeconomic and racial differences in health: patterns and
- 5 explanations. *Annual Reviews in Sociology* 1995 21:349-86.
- 6 34. Williams DR, Jackson PB. Social sources of racial disparities in health. *Health Aff*
- 7 *(Millwood)* 2005;24(2):325-34. doi: 10.1377/hlthaff.24.2.325 [published Online First:
- 8 2005/03/11]
- 9 35. Warner LR. A best practices guide to intersectional approaches in psychological research.
- 10 *Sex Roles* 2008;59:454-63.
- 11 36. Bauer GR. Incorporating intersectionality theory into population health research
- 12 methodology: challenges and the potential to advance health equity. *Soc Sci Med*
- 13 2014;110:10-7. doi: 10.1016/j.socscimed.2014.03.022
- 14 37. Graham H. Tackling inequalities in health in England: Remedying health disadvantages,
- 15 narrowing health gaps or reducing health gradients? *Journal of Social Policy*
- 16 2004;33(1):115-31.
- 17 38. Adler NE, Boyce T, Chesney MA, et al. Socioeconomic status and health. The challenge of
- 18 the gradient. *The American psychologist* 1994;49(1):15-24. [published Online First:
- 19 1994/01/01]
- 20 39. O'Neill J, Tabish H, Welch V, et al. Applying an equity lens to interventions: using
- 21 PROGRESS ensures consideration of socially stratifying factors to illuminate inequities
- 22 in health. *Journal of clinical epidemiology* 2014;67(1):56-64. doi:
- 23 10.1016/j.jclinepi.2013.08.005
- 24 40. Gianfrancesco MA, Tamang S, Yazdany J, et al. Potential Biases in Machine Learning
- 25 Algorithms Using Electronic Health Record Data. *JAMA Intern Med* 2018 doi:
- 26 10.1001/jamainternmed.2018.3763 [published Online First: 2018/08/22]
- 27 41. Abichahine H, Veenstra G. Inter-categorical intersectionality and leisure-based physical
- 28 activity in Canada. *Health Promot Int* 2017;32(4):691-701. doi: 10.1093/heapro/daw009
- 29 [published Online First: 2016/03/16]
- 30 42. Garnett BR, Masyn KE, Austin SB, et al. The intersectionality of discrimination attributes
- 31 and bullying among youth: an applied latent class analysis. *J Youth Adolesc*
- 32 2014;43(8):1225-39. doi: 10.1007/s10964-013-0073-8 [published Online First:
- 33 2013/12/10]
- 34 43. Seng JS, Lopez WD, Sperlich M, et al. Marginalized identities, discrimination burden, and
- 35 mental health: empirical exploration of an interpersonal-level approach to modeling
- 36 intersectionality. *Soc Sci Med* 2012;75(12):2437-45. doi:
- 37 10.1016/j.socscimed.2012.09.023 [published Online First: 2012/10/24]
- 38 44. Winkleby MA, Flora JA, Kraemer HC. A community-based heart disease intervention:
- 39 predictors of change. *Am J Public Health* 1994;84(5):767-72. [published Online First:
- 40 1994/05/01]
- 41 45. Frank LD, Kerr J, Sallis JF, et al. A hierarchy of sociodemographic and environmental
- 42 correlates of walking and obesity. *Prev Med* 2008;47(2):172-8. doi:
- 43 10.1016/j.ypmed.2008.04.004 [published Online First: 2008/06/21]
- 44 46. Wewers ME, Salsberry PJ, Ferketich AK, et al. Risk factors for smoking in rural women. *J*
- 45 *Womens Health (Larchmt)* 2012;21(5):548-56. doi: 10.1089/jwh.2011.3183 [published
- 46 Online First: 2012/03/01]
- 47 47. Lakerveld J, Loyen A, Schotman N, et al. Sitting too much: A hierarchy of socio-
- 48 demographic correlates. *Prev Med* 2017;101:77-83. doi: 10.1016/j.ypmed.2017.05.015
- 49 [published Online First: 2017/05/30]
- 50
- 51
- 52
- 53
- 54
- 55
- 56
- 57
- 58
- 59
- 60

- 1
- 2
- 3
- 4 48. Mulinari S, Wemrell M, Ronnerstrand B, et al. Categorical and anti-categorical approaches to
- 5 US racial/ethnic groupings: revisiting the National 2009 H1N1 Flu Survey (NHFS).
- 6 *Critical Public Health* 2017;1-13.
- 7
- 8 49. Ip EH, Rahmandad H, Shoham DA, et al. Reconciling statistical and systems science
- 9 approaches to public health. *Health Educ Behav* 2013;40(1 Suppl):123S-31S. doi:
- 10 10.1177/1090198113493911 [published Online First: 2013/10/23]
- 11
- 12 50. Blackman T. Exploring Explanations for Local Reductions in Teenage Pregnancy Rates in
- 13 England: An Approach Using Qualitative Comparative Analysis. *Soc Policy Soc*
- 14 2013;12(1):61-72. doi: 10.1017/S1474746412000358 [published Online First:
- 15 2014/01/01]
- 16
- 17 51. Valentine G. Theorizing and Researching Intersectionality: A Challenge for Feminist
- 18 Geography. *The Professional Geographer* 2007;59(1):10-21.
- 19
- 20 52. Campbell M, Ballas D. SimAlba: A Spatial Microsimulation Approach to the Analysis of
- 21 Health Inequalities. *Front Public Health* 2016;4:230. doi: 10.3389/fpubh.2016.00230
- 22 [published Online First: 2016/11/08]
- 23
- 24 53. Pavela G, Lewis DW, Dawson JA, et al. Social status and energy intake: a randomized
- 25 controlled experiment. *Clin Obes* 2017;7(5):316-22. doi: 10.1111/cob.12198 [published
- 26 Online First: 2017/09/07]
- 27
- 28 54. Shih M, Pittinsky TL, Ambady N. Stereotype susceptibility: Identity salience and shifts in
- 29 quantitative performance. *Psychological science* 1999;10(1):80-83.
- 30
- 31 55. Sokolowski R. Introduction to phenomenology. Cambridge, UK: Cambridge University Press
- 32 2000.
- 33
- 34 56. Agar M. The professional stranger. San Diego, CA: Academic Press 1996.
- 35
- 36 57. Barr B, Higgerson J, Whitehead M. Investigating the impact of the English health
- 37 inequalities strategy: time trend analysis. *Bmj-Brit Med J* 2017;358 doi: ARTN j3310
- 38 10.1136/bmj.j3310
- 39
- 40 58. Mackenbach JP. Has the English strategy to reduce health inequalities failed? *Soc Sci Med*
- 41 2010;71(7):1249-53; discussion 54-8. doi: 10.1016/j.socscimed.2010.07.014
- 42
- 43 59. Mackenbach JP. The persistence of health inequalities in modern welfare states: the
- 44 explanation of a paradox. *Soc Sci Med* 2012;75(4):761-9. doi:
- 45 10.1016/j.socscimed.2012.02.031
- 46
- 47 60. Mackenbach JP. Nordic paradox, Southern miracle, Eastern disaster: persistence of
- 48 inequalities in mortality in Europe. *European journal of public health*
- 49 2017;27(suppl\_4):14-17. doi: 10.1093/eurpub/ckx160 [published Online First:
- 50 2017/10/14]
- 51
- 52 61. Mackenbach JP, Bos V, Andersen O, et al. Widening socioeconomic inequalities in mortality
- 53 in six Western European countries. *Int J Epidemiol* 2003;32(5):830-7.
- 54
- 55 62. Olstad DL, Ancilotto R, Teychenne M, et al. Can targeted policies reduce obesity and
- 56 improve obesity-related behaviours in socioeconomically disadvantaged populations? A
- 57 systematic review. *Obes Rev* 2017;18(7):791-807. doi: 10.1111/obr.12546 [published
- 58 Online First: 2017/04/24]
- 59
- 60 63. Olstad DL, Teychenne M, Minaker LM, et al. Can policy ameliorate socioeconomic
- inequities in obesity and obesity-related behaviours? A systematic review of the impact
- of universal policies on adults and children. *Obes Rev* 2016;17(12):1198-217. doi:
- 10.1111/obr.12457

- 1  
2  
3  
4  
5  
6  
7  
8  
9  
10  
11  
12  
13  
14  
15  
16  
17  
18  
19  
20  
21  
22  
23  
24  
25  
26  
27  
28  
29  
30  
31  
32  
33  
34  
35  
36  
37  
38  
39  
40  
41  
42  
43  
44  
45  
46  
47  
48  
49  
50  
51  
52  
53  
54  
55  
56  
57  
58  
59  
60
64. Beckie TM. A systematic review of allostatic load, health, and health disparities. *Biol Res Nurs* 2012;14(4):311-46. doi: 10.1177/1099800412455688 [published Online First: 2012/09/26]
  65. Carey G, Crammond B. A glossary of policy frameworks: the many forms of 'universalism' and policy 'targeting'. *J Epidemiol Community Health* 2017;71(3):303-07. doi: 10.1136/jech-2014-204311 [published Online First: 2014/10/09]
  66. Frohlich KL, Potvin L. Transcending the known in public health practice: the inequality paradox: the population approach and vulnerable populations. *Am J Public Health* 2008;98(2):216-21. doi: 10.2105/AJPH.2007.114777
  67. McLaren L, McIntyre L, Kirkpatrick S. Rose's population strategy of prevention need not increase social inequalities in health. *Int J Epidemiol* 2010;39(2):372-7. doi: 10.1093/ije/dyp315
  68. Pearson-Stuttard J, Bandosz P, Rehm CD, et al. Reducing US cardiovascular disease burden and disparities through national and targeted dietary policies: A modelling study. *PLoS Med* 2017;14(6):e1002311. doi: 10.1371/journal.pmed.1002311 [published Online First: 2017/06/07]
  69. Platt JM, Keyes KM, Galea S. Efficiency or equity? Simulating the impact of high-risk and population intervention strategies for the prevention of disease. *SSM Population Health* 2017;3:1-8.
  70. Rose G. Sick individuals and sick populations. *Int J Epidemiol* 1985;14(1):32-8. [published Online First: 1985/03/01]
  71. Carey G, Crammond B, De Leeuw E. Towards health equity: a framework for the application of proportionate universalism. *International journal for equity in health* 2015;14:81. doi: 10.1186/s12939-015-0207-6 [published Online First: 2015/09/16]
  72. Marmot M, Allen J, Goldblatt P, et al. The Marmot Review. Fair Society, Health Lives 2010 [Available from: <http://www.instituteofhealthequity.org/resources-reports/fair-society-healthy-lives-the-marmot-review/fair-society-healthy-lives-full-report-pdf.pdf> accessed March 6 2019.
  73. Kypridemos C, Allen K, Hickey GL, et al. Cardiovascular screening to reduce the burden from cardiovascular disease: microsimulation study to quantify policy options. *BMJ* 2016;353:i2793. doi: 10.1136/bmj.i2793 [published Online First: 2016/06/10]
  74. Hargrove TW. Intersecting Social Inequalities and Body Mass Index Trajectories from Adolescence to Early Adulthood. *Journal of health and social behavior* 2018;59(1):56-73. doi: 10.1177/0022146517746672 [published Online First: 2018/01/05]

# BMJ Open

## Reconceptualizing precision public health

|                                 |                                                                                                                                    |
|---------------------------------|------------------------------------------------------------------------------------------------------------------------------------|
| Journal:                        | <i>BMJ Open</i>                                                                                                                    |
| Manuscript ID                   | bmjopen-2019-030279.R3                                                                                                             |
| Article Type:                   | Communication                                                                                                                      |
| Date Submitted by the Author:   | 22-Jul-2019                                                                                                                        |
| Complete List of Authors:       | Olstad, Dana; University of Calgary Cumming School of Medicine<br>Mcintyre, Lynn; University of Calgary Cumming School of Medicine |
| <b>Primary Subject Heading</b>: | Public health                                                                                                                      |
| Secondary Subject Heading:      | Health policy                                                                                                                      |
| Keywords:                       | Precision public health, Social determinants of health, Health inequities, Social position                                         |
|                                 |                                                                                                                                    |

SCHOLARONE™  
Manuscripts

1  
2  
3 **Title:** Reconceptualizing precision public health  
4  
5  
6  
7

8 **Authors:** Dana Lee Olstad, Lynn McIntyre  
9  
10  
11

12 **Affiliation:** Department of Community Health Sciences, Cumming School of Medicine,  
13  
14 University of Calgary, 3280 Hospital Drive NW, Calgary, Alberta T2N 2Z6 Canada  
15  
16  
17  
18

19 **Email addresses:** [dana.olstad@ucalgary.ca](mailto:dana.olstad@ucalgary.ca); [lmcintyr@ucalgary.ca](mailto:lmcintyr@ucalgary.ca)  
20  
21  
22  
23

24 **Corresponding author:** Dr. Dana Lee Olstad, 3280 Hospital Drive NW, Calgary, Alberta T2N  
25  
26 2Z6 Canada; [dana.olstad@ucalgary.ca](mailto:dana.olstad@ucalgary.ca); +01 403-210-8673  
27  
28  
29  
30  
31  
32  
33  
34  
35  
36  
37  
38  
39  
40  
41  
42  
43  
44  
45  
46  
47  
48  
49  
50  
51  
52  
53  
54  
55  
56  
57  
58  
59  
60

## ABSTRACT

As currently conceived, precision public health is at risk of becoming precision medicine at a population level. This paper outlines a framework for precision public health that, in contrast to its current operationalization, is consistent with public health principles because it integrates factors at all levels, while illuminating social position as a fundamental determinant of health and health inequities. We review conceptual foundations of public health, outline a proposed framework for precision public health and describe its operationalization within research and practice. Social position shapes individuals' unequal experiences of the social determinants of health. Thus, in our formulation, precision public health investigates how multiple dimensions of social position interact to confer health risk differently for precisely defined population subgroups according to the social contexts in which they are embedded, while considering relevant biological and behavioural factors. It leverages this information to uncover the precise and intersecting social structures that pattern health outcomes, and to identify actionable interventions within the social contexts of affected groups. We contend that studies informed by this framework offer greater potential to improve health than current conceptualizations of precision public health that do not address root causes. Moreover, expanding beyond master categories of social position and operationalizing these categories in more precise ways across time and place can enrich public health research through greater attention to the heterogeneity of social positions, their causes and health effects, leading to identification of points of intervention that are specific enough to be useful in reducing health inequities. Failure to attend to this level of particularity may mask the true nature of health risk, the causal mechanisms at play and appropriate interventions. Conceptualized thus, precision public health is a research endeavour

1  
2  
3 with much to offer by way of understanding and intervening on the causes of poor health and  
4  
5 health inequities.  
6  
7  
8  
9

10 **Keywords:** Precision public health; Social determinants of health; Health inequities; Social  
11  
12 position; Social context  
13  
14  
15  
16  
17  
18  
19  
20  
21  
22  
23  
24  
25  
26  
27  
28  
29  
30  
31  
32  
33  
34  
35  
36  
37  
38  
39  
40  
41  
42  
43  
44  
45  
46  
47  
48  
49  
50  
51  
52  
53  
54  
55  
56  
57  
58  
59  
60

For peer review only

## INTRODUCTION

### From precision medicine to precision public health

In January 2015, US President Barack Obama boldly proclaimed that precision medicine would radically transform health by tailoring treatment and prevention to the biological risk profile of the individual patient.<sup>1</sup> These individualized medical interventions would emerge from analyzing data in large biobanks, sequencing more genomes and linking biological information to electronic health records. Efforts are now underway worldwide to achieve this aim. The idea that better health might be achieved through such approaches is consistent with a biomedical model of health which posits that health is primarily a product of individual biological (e.g. genetics, age, sex) and behavioural risk factors (e.g. dietary intake, physical activity, sleep patterns). Despite the dominance of this model within modern medical practice, evidence indicates that these individual level risk factors account for limited variation in disease risk at a population level.<sup>2,3</sup> Instead, differences in health status appear to be largely attributable to the living conditions individuals encounter on a daily basis, and cumulatively over their life course.<sup>4</sup>

Regardless of whether precision medicine succeeds in tailoring treatment to the biological risk profiles of individual patients, because of the limited explanatory power of individual level risk factors, it cannot on its own yield the promised transformations in ill health at a population level. Imagine that John Snow had applied the tools of precision medicine during the 1854 cholera outbreak. He may have advised his countrymen to seek treatment individualized to their genetic susceptibility, or advised those at highest risk to alter their health behaviours. Instead, by simply removing the handle of the Broad Street pump, Snow changed the social conditions in which residents lived, preventing them from becoming sick in the first place. There must be a balance

1  
2  
3 between attention to individual biological and behavioural risk factors, and the avoidable risk  
4 factors for disease that arise from the conditions of daily life. Moreover, interventions based in a  
5 biomedical model of health remain fundamentally agnostic on the subject of health inequities,  
6 and to the extent that access to care is often greater for those with greater means,<sup>5</sup> may even  
7 exacerbate them.  
8  
9  
10  
11  
12  
13  
14  
15  
16

### 17 **Current conceptualizations of precision public health**

18  
19 Initially proposed in Australia in 2013 as a complement to the precision medicine initiative,<sup>6</sup>  
20 precision public health has been variously characterized as “providing the right intervention to  
21 the right population at the right time”,<sup>7</sup> and “applying emerging methods and technologies for  
22 measuring disease, pathogens, exposures, behaviors, and susceptibility in populations to improve  
23 health”,<sup>8</sup> among others. Big data and informatics are central to most definitions, and indeed  
24 some suggest that the use of such data are the defining feature of a precision public health  
25 approach.<sup>6,9</sup> Priority actions centre upon collecting data from large, diverse samples, amassing  
26 unbiased genetic and environmental data, education, public health-health care partnerships, early  
27 detection especially through genome sequencing, and enhancing public health surveillance and  
28 tracking.<sup>7,9</sup> It has further been suggested that the aims of precision medicine and public health  
29 might be reconciled through scaling-up precision medicine approaches to whole populations,<sup>6</sup>  
30 and by incorporating information on environmental and socioeconomic factors into precision  
31 medicine analyses.<sup>10</sup>  
32  
33  
34  
35  
36  
37  
38  
39  
40  
41  
42  
43  
44  
45  
46  
47  
48  
49  
50

51 It therefore appears that, as currently conceived, precision public health is precision medicine  
52 scaled-up to a population level, often through leveraging big data, the science of ‘omics’ and  
53  
54  
55  
56  
57

1  
2  
3 other technological advancements.<sup>11</sup> Noticeably absent from this body of literature is focused  
4  
5 attention to foundational public health concepts such as social position, the social determinants  
6  
7 of health and health inequities, nor to their political and social origins, meanings and  
8  
9 implications. That the modern conception of precision public health should be so heavily rooted  
10  
11 in a biomedical paradigm of health is antithetical to the very foundations of public health, and  
12  
13 points to a need to both enlarge the scope of, and refocus current definitions on core public  
14  
15 health concepts.  
16  
17  
18  
19  
20

## 21 **Objectives**

22  
23 The purpose of this paper is to posit a precision public health approach that expands upon and  
24  
25 refocuses current definitions on the social causation of health and health inequities. We offer a  
26  
27 renewed vision for precision public health that places social position and its context-specific  
28  
29 interacting dimensions, determinants, and health consequences at the heart of study, and seeks to  
30  
31 study these with greater precision in order to identify points of intervention that are specific  
32  
33 enough to be useful in reducing health inequities. In this way, the framework offers a means to  
34  
35 integrate factors at all levels within an overarching population-based approach to supporting  
36  
37 health and health equity, while illuminating social position as a fundamental determinant of  
38  
39 health and health inequities. We argue that the proposed framework may offer greater potential  
40  
41 to improve health and reduce health inequities than primarily biomedically-based notions of  
42  
43 precision public health that do not address root causes, and public health as currently practiced  
44  
45 which, although it addresses root causes, does so in a homogenizing way. We begin with a brief  
46  
47 review of the conceptual foundations of public health, then present a case for more precise  
48  
49  
50  
51  
52  
53  
54  
55  
56  
57  
58  
59  
60

1  
2  
3 attention to social position within a reconceptualized and more comprehensive framework for  
4 precision public health, and describe its operationalization within research and practice.  
5  
6  
7  
8  
9

## 10 **CONCEPTUAL FOUNDATIONS OF PUBLIC HEALTH**

### 11 **Social determinants of health**

12  
13  
14 The social determinants of health encompass the conditions of daily life in which individuals are  
15 born, grow, live, work and age, including features associated with their early childhood,  
16 employment grade, housing conditions, incomes, experiences of discrimination, neighbourhood  
17 environments and level of education.<sup>4</sup> Individual biology and health behaviours are included,  
18 but occupy a less prominent role as mediators through which the social determinants of health  
19 act to shape health. That the quality of social conditions should so fundamentally shape the  
20 health of individuals and populations was perhaps most convincingly demonstrated by the  
21 Whitehall Studies of British civil servants, whereby it was shown that health declined with each  
22 step down the social ladder, even among a group of relatively well-paid individuals with stable  
23 employment, and for whom health care was provided as a matter of right.<sup>2</sup> The 2008 report of  
24 the WHO Commission on the Social Determinants of Health synthesized evidence on the social  
25 determinants of health into a coherent framework and agenda for action.<sup>4</sup> A key contribution  
26 was its acknowledgment that addressing the social determinants of health implies a joint attack  
27 on both the social causes of poor health and health inequities.  
28  
29  
30  
31  
32  
33  
34  
35  
36  
37  
38  
39  
40  
41  
42  
43  
44  
45  
46  
47  
48

### 49 **Health inequities and social position**

50  
51 Health inequities are systematic differences in health between groups occupying unequal  
52 positions within society.<sup>4</sup> These differences are not merely a problem between the extremes of  
53  
54  
55  
56  
57  
58  
59  
60

1  
2  
3 the continuum, but are evident across the entire social gradient. Health inequities are a  
4  
5 consequence of societal structures that distribute resources, power and prestige according to  
6  
7 factors such as income, education, occupation, and others.<sup>4</sup> While the term health inequalities  
8  
9 refers to differences in health, the concept of inequities invokes a moral judgement that these  
10  
11 differences are unfair because they are potentially avoidable. Inherent within a social  
12  
13 determinants perspective is the need to attend to both the social factors that shape the health of  
14  
15 individuals and populations, and the social processes that govern their social patterning.<sup>4 12</sup>  
16  
17  
18  
19  
20

21 The conceptual framework elaborated by the WHO Commission on Social Determinants of  
22  
23 Health <sup>4</sup> has summarized the social production of health and health inequities as follows: 1)  
24  
25 Social contexts, broadly interpreted to include the interlocking societal structures that shape the  
26  
27 distribution of resources within society, create social stratification by assigning individuals to  
28  
29 different social positions; 2) Social position shapes individuals' exposures and vulnerability to  
30  
31 intermediary determinants of health, which include material and psychosocial circumstances,  
32  
33 along with behavioural and biological factors; 3) Systematic differences in health emerge across  
34  
35 the entire social spectrum in response to these differential exposures and vulnerabilities; and 4)  
36  
37 Health outcomes feedback to affect individuals' social position (whether positively or  
38  
39 negatively), along with the operation of social, political and economic institutions. Thus, the  
40  
41 framework provides a means of understanding how factors at multiple levels interact to shape  
42  
43 health at a population level, and their relative importance in this respect. With its strong  
44  
45 emphasis on social structures the conceptual framework is perhaps overly deterministic, however  
46  
47 the accompanying framework for tackling inequities in social determinants highlights the  
48  
49 importance of policies that not only address social structures, but that simultaneously promote  
50  
51  
52  
53  
54  
55  
56  
57  
58  
59  
60

1  
2  
3 intersectoral action and social participation and empowerment; the latter of which can assist  
4 individuals, families and communities to exercise their agency in health-promoting ways and  
5  
6 thereby escape negative feedback loops.  
7  
8

9  
10 Whereas the social determinants of health encompass all of the social factors that shape health  
11 collectively, the quality of the social determinants that individuals experience is governed by  
12 their position within the social hierarchy, which we refer to hereafter as social position.<sup>12</sup> Social  
13 position therefore marks the point where societal structures intersect with the lives of individuals  
14 by shaping their unequal experiences of the social determinants of health, and in this way  
15 constitutes a lynchpin mechanism through which health inequities are generated, perpetuated and  
16 maintained.<sup>4 12 13</sup> Understanding how multiple layers of advantage and disadvantage overlap,  
17 interact and are embodied across the life course within the construct of ‘social position’ is  
18 therefore central to understanding the social production of (ill) health and corresponding points  
19 of intervention. While the terms social class, socioeconomic status, social position and  
20 socioeconomic position are often used interchangeably, we designate social position as the  
21 higher order, aggregate construct that reflects individuals’ perceived and objective placement  
22 within hierarchies of prestige, power and access to resources.<sup>14</sup>  
23  
24  
25  
26  
27  
28  
29  
30  
31  
32  
33  
34  
35  
36  
37  
38  
39  
40  
41

### 42 **(Re)Conceptualizing and operationalizing social position**

43  
44 Given that social position is a key mediator of health and health inequities, primarily  
45 biomedically-based conceptualizations of precision public health that largely ignore, or that  
46 relegate social position to a subordinate role, offer limited potential to improve health. However,  
47 to redefine precision public health by merely adding a more prominent role for social factors  
48 alongside biological and behavioural ones would fail to mark precision public health as distinct  
49  
50  
51  
52  
53  
54  
55  
56  
57  
58  
59  
60

1  
2  
3 from current public health practice. It would also would miss the opportunity to consider whether  
4 social position might be more effectively conceptualized and operationalized to advance health  
5 and health equity, and it is to this issue that we now turn.  
6  
7  
8  
9

10  
11  
12 In modern liberal welfare states, individuals' attain different positions within the social hierarchy  
13 according to factors such as level of income, educational attainment and occupation, and as such  
14 many studies operationalize social position according to one or several of these objective  
15 indicators, what we refer to as 'master categories.'<sup>4 15</sup> It is important that these indicators not be  
16 conflated, however, as although they overlap, they also represent different structures of  
17 inequality. For example, income is an indicator that most directly reflects access to material  
18 resources (e.g. housing, food, clothing), whereas education closely reflects knowledge-related  
19 assets and is a strong determinant of future employment and income.<sup>4 16</sup> That these three  
20 categories should consistently be accorded greater significance relative to others in explaining  
21 the patterning of health may be more a matter of convenience (i.e. the data are available) than an  
22 evidence-based practice, and disregards other powerful dimensions of inequity. Indeed, common  
23 measures of social position explain only a fraction of the structural inequities confronted by  
24 racial/ethnic minorities.<sup>17</sup>  
25  
26  
27  
28  
29  
30  
31  
32  
33  
34  
35  
36  
37  
38  
39  
40  
41  
42  
43

44 Focusing on these unitary categories of difference to the exclusion of others or in isolation from  
45 one another, as many studies do, may obscure understanding of the complexity of social position.  
46  
47 A more comprehensive perspective acknowledges social position as a context-specific social  
48 construct that represents a mixture of these and other axes of social differentiation,<sup>15</sup> including  
49 age, gender/sex, race/ethnicity, wealth, citizenship status, religion and disability.<sup>4</sup> Bourdieu's<sup>18</sup>  
50  
51  
52  
53  
54  
55  
56  
57  
58  
59  
60

1  
2  
3 notions of economic, social and cultural capital are other aspects of social position that can  
4 reflect, respectively, financial, relational and socially distinctive assets. Identity- and rank-based  
5 perceptions of ones' own social position must also be considered,<sup>15</sup> and, because they entail a  
6 reflective averaging of past and current statuses and future expectations,<sup>15 19 20</sup> may embody the  
7 cumulative, combined and interactive effects of multiple dimensions of social position more  
8 fully than objective indicators.  
9  
10  
11  
12  
13  
14  
15  
16  
17  
18

19 In addition to expanding beyond master categories of social position, attending to the  
20 heterogeneity within them may further improve understanding of health inequities by examining  
21 individuals as persons whose experiences of health cannot be ascertained on the basis of any one  
22 indicator.<sup>15 21</sup> Intersectionality theory uses the term social location to refer to the interplay among  
23 a variety of social determinants in shaping the unique social experiences of vulnerable groups. A  
24 key insight from this theoretical approach is that experiences of advantage and disadvantage are  
25 not merely additive in their effects.<sup>22</sup> Some groups experience more negative, and others more  
26 positive health effects than would be predicted on the basis of adding together their individual  
27 positions.<sup>22-24</sup> For instance, among Black women in the US with less than a high school  
28 education, being a Black woman has a negative effect on health beyond the main effects  
29 contributed by race, gender and other factors.<sup>22</sup> Notably, this effect disappears among Black  
30 women who attain a higher level of education.  
31  
32  
33  
34  
35  
36  
37  
38  
39  
40  
41  
42  
43  
44  
45  
46  
47  
48

49 What this example illustrates is that not only do inequities in the distribution of social resources  
50 correlate highly with race/ethnicity, education and gender/sex, but also that these inequities are  
51 enhanced through interactions among these and other factors.<sup>22</sup> That is, there is no prototypical  
52  
53  
54  
55  
56  
57  
58  
59  
60

1  
2  
3 experience of what it means to be a woman, instead, women experience their gender differently  
4 based on their position within other social structures of race/ethnicity, class, and others.<sup>24</sup>

5  
6  
7 Dimensions of social position must therefore be interrogated in tandem, because it is at the nexus  
8 of these intersecting domains that a precise social identity is created whose health effects cannot  
9 be understood on the basis of its individual parts.<sup>25</sup> Failure to attend to these interactions may  
10 limit understanding of how the meanings of different dimensions of social position are mutually  
11 constituted, simultaneously experienced, and jointly associated with health, thereby yielding  
12 misleading results.<sup>26</sup>

13  
14  
15 Beyond considering its varied, mutually-constituted and reinforcing dimensions, there are many  
16 other ways in which social position could be operationalized in more precise ways to advance  
17 public health research. For instance, indicators of social position are often dichotomized (e.g. <  
18 high school education vs > high school education; White vs 'other'), which may obscure  
19 gradients across the entire social spectrum or for particular groups (e.g. racial/ethnic minorities)  
20 that might be uncovered by using more categories or continuous measures.<sup>21 27</sup> Studies may only  
21 consider quantitative aspects of social position (e.g. years of education), while neglecting its  
22 qualitative dimensions (e.g. quality of the education received),<sup>28</sup> or they may focus exclusively at  
23 the individual level and neglect factors at the contextual level (e.g. neighbourhood disadvantage)  
24 that may also be theoretically relevant.<sup>21</sup> Furthermore, given that social position is socially  
25 constructed, some axes of differentiation may be more salient in particular times and places. The  
26 health effects of social position should therefore be studied in particular historical moments and  
27 within particular social, political, geographic and economic contexts, including at the broader  
28 contextual level (e.g. year, nation) and specific to the life course (e.g. age, marital status, place of  
29  
30  
31  
32  
33  
34  
35  
36  
37  
38  
39  
40  
41  
42  
43  
44  
45  
46  
47  
48  
49  
50  
51  
52  
53  
54  
55  
56  
57  
58  
59  
60

1  
2  
3 residence).<sup>21</sup> Yuval-Davis<sup>29</sup> has labelled these considerations translocality (how the meaning of  
4 social position varies by place), transcalarity (how the meaning of social position varies in small  
5 scale settings vs in higher level regions) and transtemporality (how the meaning of social  
6 position varies over time).  
7  
8  
9  
10  
11  
12

### 13 14 15 **Contextual pathways to social position**

16  
17 The purpose of expanding beyond master categories of social position and operationalizing these  
18 categories in more precise ways is to further understanding of the nature of health risk, the causal  
19 mechanisms at play, and ultimately identify potential points of intervention that are specific  
20 enough to be useful in reducing health inequities. Health inequities are generated within a  
21 sociopolitical context, including systems of governance, economic, social and public policies,  
22 culture and societal values.<sup>4</sup> These contextual factors create, configure and maintain patterns of  
23 social stratification by determining the manner in which power and resources are distributed  
24 amongst social groups. Thus, it is within the social context that the so-called ‘causes of the  
25 causes’ of health inequities ultimately reside.<sup>4</sup>  
26  
27  
28  
29  
30  
31  
32  
33  
34  
35  
36  
37  
38  
39

40 The identification of health inequities according to dimensions of social position (e.g.  
41 race/ethnicity and income) therefore provides an indication that exclusionary processes are at  
42 play (e.g. racial/ethnic segregation, inadequate social protection policies) that require further  
43 investigation. They can also prompt a search for inclusionary processes (e.g. opportunities for  
44 social interaction) that may buffer these same processes of marginalization. Therefore, just as the  
45 multi-faceted nature of social position requires precise quantification, so too do the broader  
46 macro level factors that structure them; and the role of the former is primarily to prompt and  
47  
48  
49  
50  
51  
52  
53  
54  
55  
56  
57  
58  
59  
60

1  
2  
3 inform a more in-depth examination of the latter. By linking health inequities experienced by  
4 those occupying precise social positions to their precise social contexts, we can better consider  
5 causal pathways and begin to identify opportunities for intervention that address the root causes  
6 of these inequities. The interventions that arise from such analyses are likely to be more effective  
7 and efficient because they address specific sources of social differentiation.  
8  
9  
10  
11  
12  
13  
14  
15  
16

17 A case in point concerns educational gradients in health in the US.<sup>28</sup> Although a gradient is  
18 evident in men and women<sup>30</sup> and among all racial/ethnic groups,<sup>31</sup> the incremental value of  
19 educational attainment appears strongest in women,<sup>32</sup> and non-Hispanic whites.<sup>33 34</sup> These  
20 findings could prompt a search for contextual factors that suppress the value of educational  
21 attainment for some groups, while enhancing it for others. In this respect, Zajacova et al<sup>28</sup>  
22 recommend that investigators leverage differences in policies and other contextual conditions  
23 that exist across geopolitical boundaries and/or changes in these over time to understand how  
24 contextual factors might exacerbate or mitigate education-health associations. . Such analyses  
25 should also attend to the ways in which these institutional structures interact with one another  
26 and with dimensions of social position to shape health, and how their health effects vary over  
27 time. In this way, identification of heterogeneity in health outcomes can prompt a search for the  
28 sources of this underlying heterogeneity, directing resources to the most pressing and important  
29 contextual targets, particularly those that cut across positional categories.  
30  
31  
32  
33  
34  
35  
36  
37  
38  
39  
40  
41  
42  
43  
44  
45  
46  
47  
48

## 49 **A FRAMEWORK FOR PRECISION PUBLIC HEALTH**

### 50 **Reconceptualizing precision in public health**

51  
52  
53  
54  
55  
56  
57  
58  
59  
60

1  
2  
3 We have described social position and its complex and mutually constituted dimensions, along  
4 with the contextual factors that generate, configure and maintain patterns of social stratification  
5 as key targets for focused investigation, and have highlighted areas in which greater precision  
6 might be achieved in order to more precisely identify dimensions of social position that confer  
7 health risk, and the social contexts that configure them. We now use the preceding discussion as  
8 a basis to outline a framework for precision public health that integrates factors at all levels, from  
9 the biological to the social, within an overarching population-based approach to advancing health  
10 and health equity. The framework is distinguished by its explicit focus on social position as a  
11 root cause of ill health, and in seeking to operationalize this construct in more precise ways. In  
12 this way, the proposed framework affords potential for more effective intervention than primarily  
13 biomedically-based notions of precision public health that are less comprehensive in their  
14 orientation because they do not address root causes, and current public health research that  
15 homogenizes individuals' health experiences.

16  
17  
18  
19  
20  
21  
22  
23  
24  
25  
26  
27  
28  
29  
30  
31  
32  
33  
34  
35 Central to the notion of precision in health is the concept of identifying specific risk factor  
36 profiles that confer vulnerability to poor health. Whereas precision medicine regards  
37 vulnerability primarily as a function of individual biomedical and behavioural risks, vulnerability  
38 within a social determinants paradigm is a population level, emergent process that unfolds across  
39 the life course in response to multiple and varied experiences of social privilege and  
40 marginalization in a variety of contexts. Thus, social position and its context-specific interacting  
41 dimensions, determinants, and health consequences constitute the central locus of study within a  
42 precision public health approach, while considering relevant biological and behavioural factors.  
43  
44  
45  
46  
47  
48  
49  
50  
51  
52  
53  
54 That the context exerts its influence on health via social position marks both as important  
55  
56  
57

1  
2  
3 priorities of investigation. However, because the causes of health inequities originate within the  
4 social context, it is the context, rather than social position itself, that presents the most effective  
5 opportunities for intervention. A more fulsome and precise characterization of social position  
6 may more accurately pinpoint the origins of health inequities within the social context, enabling  
7 development of interventions that have a greater likelihood of success because they attend to the  
8 particular experiences and contexts of precisely characterized groups.  
9

10  
11  
12  
13  
14  
15  
16  
17  
18  
19 We therefore propose that attention to social position reframes the practice and aims of precision  
20 public health to be:  
21  
22

23  
24  
25  
26 *Precision public health investigates how multiple dimensions of social position interact to confer*  
27 *health risk differently for precisely defined population subgroups according to the social*  
28 *contexts in which they are embedded, while considering relevant biological and behavioural*  
29 *factors. It leverages this information to uncover the precise social structures and processes that*  
30 *pattern health outcomes, and to identify actionable interventions within the social contexts of*  
31 *affected groups.*  
32  
33  
34  
35  
36  
37  
38  
39  
40  
41

## 42 **OPERATIONALIZING PRECISION PUBLIC HEALTH IN RESEARCH TO INFORM**

### 43 **PRACTICE**

44  
45  
46  
47 Based on this definition and related substantive considerations, the accompanying Text Box  
48 proposes six recommendations for operationalizing a precision public health study from  
49 theoretical premise through identifying promising interventions. Precision should be sought in  
50 the areas that are the most theoretically meaningful within the context of each individual study,  
51  
52  
53  
54  
55  
56  
57

1  
2  
3 while acknowledging that a minimum of two should be implemented in tandem to constitute an  
4  
5 instance of precision public health.  
6  
7

8  
9  
10 **Use theory within a precision public health framework as a conceptual and operational**  
11 **guide to research**  
12  
13

14 Precision public health provides a framework for investigating the precise contextual pathways,  
15 mediated by social position, through which health inequities arise. This broader framework can  
16 accommodate theoretical and methodological diversity. For instance, precision public health  
17 studies could investigate materialist or psychosocial mechanisms underlying health inequities.  
18  
19 Therefore, the starting point for precision public health studies is to articulate the hypothesized  
20 theoretical processes and experiences of social stratification at play. This theory can then  
21 provide a conceptual and operational guide for conducting the research, and in particular, to  
22 select meaningful social positions and contexts for study in relation to the health outcomes of  
23 interest. Nevertheless, the utility of some theories may be limited, given that they often entail  
24 rather imprecise notions of how social position shapes health. Results from precision public  
25 health analyses may, over time, contribute greater precision to these theories.  
26  
27  
28  
29  
30  
31  
32  
33  
34  
35  
36  
37  
38  
39  
40  
41

42 Precision public health does not entail the study of all possible social position-social context  
43 combinations, but encourages scientists to attend to meaningful diversity within samples that  
44 capture salient social experiences, while acknowledging the potential implications of excluding  
45 others.<sup>35</sup> A key consideration concerns whether all social positions are equally deserving of  
46 study, or only those that are associated with the greatest disadvantage.<sup>36</sup> Importantly, health  
47 inequities exist across the entire social spectrum,<sup>2 4 37 38</sup> and most populations will experience  
48  
49  
50  
51  
52  
53  
54  
55  
56  
57

1  
2  
3 forms of advantage and disadvantage across the life course.<sup>36</sup> It is therefore important to  
4  
5 understand how experiences of advantage and disadvantage interact to shape health in all social  
6  
7 groups, and how they vary across time and place, to ensure a more comprehensive understanding  
8  
9 of the social production of health. The acronym PROGRESS-PLUS<sup>39</sup> (Place of residence;  
10  
11 Race/ethnicity/culture/language; Occupation; Gender/sex; Religion; Education; socioeconomic  
12  
13 position and social capital; PLUS captures all other indicators of disadvantage) includes many  
14  
15 indicators of disadvantage, and may be helpful in identifying salient social categories that  
16  
17 interact.  
18  
19  
20  
21  
22  
23

#### 24 **Identify the precise social positions and contexts of groups with systematically poorer** 25 **health relative to more advantaged groups**

26  
27 Having developed a theory-informed research plan, analyses can then proceed to identify the  
28  
29 precise social positions and contexts of groups with systematically poorer health relative to more  
30  
31 advantaged groups.  
32  
33  
34  
35  
36  
37

38 A variety of methods, both existing and new, and bridging all three traditions – quantitative,  
39  
40 qualitative and mixed - can contribute to precision public health analyses. Machine learning, in  
41  
42 which machines learn from patterns in the data rather than being pre-programmed to follow a  
43  
44 particular analytical routine, is among the most promising approaches for uncovering novel  
45  
46 intersections worthy of further study. However, caution is required given the potential to  
47  
48 exacerbate existing inequities when data are missing or incomplete for some social groups.<sup>40</sup>  
49  
50 Other quantitative methods that can be adapted for precision public health applications span  
51  
52 traditional techniques (e.g. including interaction terms in regression analyses,<sup>22 41</sup> structural  
53  
54  
55  
56  
57  
58  
59  
60

1  
2  
3 equation modelling, and latent class,<sup>42</sup> mediation,<sup>43</sup> and path analysis), to the more novel and  
4 complex (e.g. multilevel modelling,<sup>23</sup> signal detection models,<sup>44</sup> Chi-Square Automatic  
5 Interaction Detection,<sup>45-47</sup> quantifying discriminatory accuracy,<sup>48</sup> agent-based modelling<sup>49</sup>).  
6  
7 Modelling approaches that explicitly allow consideration of multiplicative, rather than simply  
8 additive positionalities, may be particularly helpful.<sup>22</sup> Situating the analyses in particular  
9  
10 historical and social moments, both to provide background for the reader, and when interpreting  
11 findings, is essential. Methods such as qualitative comparative analyses<sup>50</sup> and multiple case  
12 studies<sup>51</sup> that explicitly account for context may be particularly valuable in this respect, as can  
13 longitudinal analyses that examine change in social positions in relation to change in health over  
14 time. Marginalized groups that co-locate geographically may be subject to similar policy,  
15 environmental and social exposures; and therefore area-based analyses to identify areas with a  
16 high burden of disease, and/or where income inequality is high may help to identify contexts for  
17 focused study.<sup>52</sup>  
18  
19  
20  
21  
22  
23  
24  
25  
26  
27  
28  
29  
30  
31  
32  
33  
34

35 Reconceptualizing constructs such as race/ethnicity and gender as social processes (i.e.  
36 experiences of racism and sexism), rather than as characteristics of individuals may prove  
37 valuable in helping to uncover structural causes of inequities, particularly those that cut across  
38 intersections of social position.<sup>26 35</sup> Experimental techniques that manipulate subjective social  
39 position<sup>53</sup> and that prime certain identities<sup>54</sup> are also promising. Finally, qualitative methods are  
40 well-suited to understanding the experience of health inequities and the social mechanisms that  
41 generate and configure them. In particular, phenomenology can provide an in-depth perspective  
42 of the lived experience of social position,<sup>55</sup> while ethnography can help to understand the  
43 collective cultures and norms of specific social groups from an 'emic' perspective.<sup>56</sup> These and  
44  
45  
46  
47  
48  
49  
50  
51  
52  
53  
54  
55  
56  
57  
58  
59  
60

1  
2  
3 other types of qualitative analyses can complement, supplement or triangulate quantitative  
4 analyses within mixed methods studies. Bauer<sup>36</sup> and Warner<sup>35</sup> have summarized a variety of  
5 intersectional methods that might also be adapted for precision public health applications.  
6  
7  
8  
9

### 11 **Knowledge-to-action: Precision public health in the real-world**

12  
13  
14 The aims of precision public health will only be realized to the extent that findings are mobilized  
15 into real-world interventions that effectively address the social drivers of poor health and of  
16 health inequities. Current public health approaches to mitigating inequities primarily consist of  
17 universal programs and policies that operate across entire populations, and targeted approaches  
18 that direct attention to those considered to be the worst off.<sup>14</sup> Precision public health is most  
19 closely aligned with the notion of targeting, however the two are not synonymous, as in many  
20 cases, targeting problematizes the broad behavioural and social risk factor profiles of individuals,  
21 rather than the structural forces responsible for situating them within disadvantaged social  
22 contexts. Although limited progress is evident in some cases,<sup>57</sup> these programs and policies have  
23 largely proven incapable, on their own, of substantially reducing health inequities,<sup>58-63</sup> suggesting  
24 that new, complementary approaches may be needed.  
25  
26  
27  
28  
29  
30  
31  
32  
33  
34  
35  
36  
37  
38  
39  
40  
41

42 Interventions formulated within a precision public health paradigm may represent one such  
43 complementary approach. Greater precision in formulating public health interventions may help  
44 to avoid creation of programs and policies that meaningfully apply to no one because they  
45 concern factors that shape the health of ‘average’ disadvantaged individuals who may not  
46 actually exist. Moreover, a precision public health approach appropriately targets social  
47 processes and contexts rather than high-risk individuals and groups, and seeks to directly alter  
48  
49  
50  
51  
52  
53  
54  
55  
56  
57

1  
2  
3 these social processes and contexts rather than to simply mute the unhealthy effects of social  
4 position (i.e. an approach we liken to prescribing an ‘equitinol’ pill that dampens the  
5 pathophysiologic response to allostatic load (e.g. <sup>64</sup>)). Nevertheless, given that health is shaped  
6 by a chain of social processes, interventions of all types – universal, targeted and precise - and  
7 spanning all leverage points - upstream, midstream and downstream – are needed, and can  
8 complement one another.<sup>37 65-70</sup> Precision public health interventions might therefore be most  
9 usefully enacted within a reframed proportionate universalist approach whereby some  
10 interventions are universally provided, while others are targeted or precisely tailored to meet the  
11 needs of, and offset barriers to health encountered by vulnerable subgroups.<sup>71 72</sup> Modelling  
12 studies support the efficacy of such strategies in reducing health inequities.<sup>73</sup> A precision public  
13 health lens also encourages attention to the effects of interventions on subgroups who are not the  
14 intended targets.

## 33 **DISCUSSION AND CONCLUSIONS**

34  
35 The renewed vision of precision public health presented herein endeavours to disrupt biomedical  
36 approaches to health and linear thinking that essentializes the health experiences of  
37 heterogeneous groups. Social position is an inherently dynamic social construct, consisting of  
38 mutually constituted objective and subjective components. It is precisely this complexity that  
39 most previous investigations have ignored, that we maintain may in fact be perpetuating health  
40 inequities. Embracing this complexity through a precision public health approach may yield  
41 considerable progress in improving health and reducing health inequities, but will require a  
42 fundamental paradigm shift in the manner in which social position is conceptualized and  
43 operationalized within research, and ultimately within practice (Table 1).

1  
2  
3  
4  
5 Health inequities constitute inequities in people's capacity to function and realize their full  
6 potential, making them a priority for intervention within any just society. However, despite  
7 attempts to eliminate them, health inequities persist and have even widened in some cases. If we  
8 accept that health inequities are socially patterned, then it follows that their solutions must also  
9 be. Current conceptualizations of precision public health based primarily in a biomedical model  
10 of health cannot therefore, on their own, yield significant progress toward this end. Precision  
11 public health is not simply precision medicine at a population level, and therefore its definition  
12 must encompass factors at all levels, while illuminating social position as a fundamental  
13 determinant of health and health inequities.  
14  
15  
16  
17  
18  
19  
20  
21  
22  
23  
24  
25  
26  
27

28 Some might question whether the term 'precision public health' is even necessary. We believe  
29 that 'precision' may be a valuable addition to the public health lexicon because it signals a  
30 departure from the conventional public health paradigm by drawing attention to the  
31 heterogeneity of social position. Health inequities may be driven by multiply marginalized  
32 populations who experience excess health risk.<sup>21-23 41 74</sup> Expanding beyond master categories of  
33 social position, and operationalizing these categories in more precise ways across time and place,  
34 can enrich conventional public health research through greater attention to the heterogeneity of  
35 social positions, their causes and health effects, leading to identification of points of intervention  
36 that are specific enough to be useful in reducing health inequities. Failure to attend to this level  
37 of particularity may mask the true nature of risk, the causal mechanisms at play and the most  
38 appropriate interventions. Conceptualized thus, precision public health is a research endeavour  
39 and an aspect of public health practice with much to offer by way of understanding and  
40  
41  
42  
43  
44  
45  
46  
47  
48  
49  
50  
51  
52  
53  
54  
55  
56  
57

1  
2  
3 intervening on the causes of poor health and health inequities. We anticipate that adoption of our  
4 proposed framework will accelerate progress toward this end, while also helping to generate  
5 more detailed, empirically-grounded theory of how aspects of social position interact with one  
6 another and with societal processes to shape health across the life course. Critical next steps will  
7 entail development of a common precision public health ontology and conceptual measurement  
8 models.  
9  
10  
11  
12  
13  
14  
15  
16  
17  
18  
19  
20  
21

### 22 **Authors' contributions**

23 DLO and LM conceived of and wrote the paper. All authors read and approved the final  
24 manuscript.  
25  
26  
27

### 28 **Competing interests**

29 None.  
30  
31  
32

### 33 **Funding**

34 This study did not receive any specific grant from funding agencies in the public, commercial, or  
35 not-for-profit sectors.  
36  
37  
38

### 39 **Acknowledgements**

40 The authors wish to acknowledge helpful comments provided by Dr. Kim Raine on a draft  
41 version of this article.  
42  
43  
44  
45  
46

### 47 **License statement**

48 I, the Submitting Author has the right to grant and does grant on behalf of all authors of the  
49 Work (as defined in the below author licence), an exclusive licence and/or a non-exclusive  
50 licence for contributions from authors who are: i) UK Crown employees; ii) where BMJ has  
51  
52  
53  
54  
55  
56  
57

1  
2  
3 agreed a CC-BY licence shall apply, and/or iii) in accordance with the terms applicable for US  
4  
5 Federal Government officers or employees acting as part of their official duties; on a worldwide,  
6  
7 perpetual, irrevocable, royalty-free basis to BMJ Publishing Group Ltd (“BMJ”) its licensees and  
8  
9 where the relevant Journal is co-owned by BMJ to the co-owners of the Journal, to publish the  
10  
11 Work in BMJ Open and any other BMJ products and to exploit all rights, as set out in  
12  
13 our licence.  
14  
15

16  
17 The Submitting Author accepts and understands that any supply made under these terms is made  
18  
19 by BMJ to the Submitting Author unless you are acting as an employee on behalf of your  
20  
21 employer or a postgraduate student of an affiliated institution which is paying any applicable  
22  
23 article publishing charge (“APC”) for Open Access articles. Where the Submitting Author  
24  
25 wishes to make the Work available on an Open Access basis (and intends to pay the relevant  
26  
27 APC), the terms of reuse of such Open Access shall be governed by a Creative Commons licence  
28  
29 – details of these licences and which Creative Commons licence will apply to this Work are set  
30  
31 out in our licence referred to above.  
32  
33  
34  
35  
36  
37  
38  
39  
40  
41  
42  
43  
44  
45  
46  
47  
48  
49  
50  
51  
52  
53  
54  
55  
56  
57  
58  
59  
60

1  
2  
3 **Text Box 1: Recommendations for achieving greater precision in public health.** Precision  
4 should be sought in the areas that are the most theoretically meaningful within the context of  
5  
6 each individual study, while acknowledging that a minimum of two should be implemented in  
7  
8 tandem to constitute an instance of precision public health.  
9  
10

- 11  
12 1. Provide explicit and **precise descriptions of the theoretical rationale** underlying the  
13 selection and operationalization of social positions, social contexts, health outcomes, and  
14 potential confounders. **The proposed causal pathways should be precisely identified a**  
15 **priori.**  
16  
17  
18  
19  
20
- 21 2. **Identify the precise social positions of populations of interest** and investigate their  
22 associations with health by expanding beyond common unitary categories to examine  
23 other dimensions of social position, and the heterogeneity that exists within social  
24 categories. Measures of **perceived social position** should be explored more fully.  
25  
26  
27  
28  
29
- 30 3. **Operationalize social position in more precise ways**, such as by using continuous  
31 measures or more categories, considering qualitative and quantitative features, and  
32 considering factors at multiple levels.  
33  
34  
35  
36  
37
- 38 4. **Describe the precise time and context of measurement of social position** and study the  
39 health effects of social position **in a variety of contexts and at multiple time points**  
40 **across the life course.**  
41  
42  
43  
44
- 45 5. Use **precise language to describe health inequities** (e.g. inequities in cardiovascular  
46 disease according to wealth and gender).  
47  
48
- 49 6. Use knowledge of the health effects of individuals' precise social positions to inform the  
50 study of **precise contextual mechanisms** responsible for situating them there. Leverage  
51 this information to propose **precise interventions** to ameliorate health inequities  
52  
53  
54  
55  
56  
57

**Table 1 Reconceptualizing precision in public health**

| <b>Move away from...</b>                                                                     | <b>Move towards...</b>                                                                                                               |
|----------------------------------------------------------------------------------------------|--------------------------------------------------------------------------------------------------------------------------------------|
| Biomedical model of health                                                                   | Social determinants model of health                                                                                                  |
| The functions (e.g. surveillance) and methods (e.g. big data) of public health               | The foundations (e.g. social determinants) and core aims (e.g. improve population health, reduce health inequities) of public health |
| Unitary, master categories of objective social position (i.e. income, education, occupation) | Social position as a construct that is both objective and perceived through lived experiences                                        |
| Problematizing individuals and their behaviours                                              | Problematizing the social contexts that create social stratification                                                                 |
| Scaled-up versions of individual level interventions                                         | Interventions that address the root causes of health inequities                                                                      |
| Precision medicine for the population                                                        | Precision public health                                                                                                              |

**REFERENCES**

1. CNN Politics. State of the Union 2015: Full transcript 2015 [Available from:  
<https://www.cnn.com/2015/01/20/politics/state-of-the-union-2015-transcript-full-text/index.html> accessed June 15, 2018.
2. Marmot MG, Rose G, Shipley M, et al. Employment grade and coronary heart disease in British civil servants. *J Epidemiol Community Health* 1978;32(4):244-9.
3. Marmot MG, Smith GD, Stansfeld S, et al. Health inequalities among British civil servants: the Whitehall II study. *Lancet* 1991;337(8754):1387-93. [published Online First: 1991/06/08]
4. Commission on Social Determinants of Health. CSDH final report: closing the gap in a generation: health equity through action on the social determinants of health Geneva: World Health Organization; 2008 [Available from:  
[http://www.who.int/social\\_determinants/publications/commission/en/](http://www.who.int/social_determinants/publications/commission/en/) accessed November 11, 2017.
5. Adler NE, Boyce WT, Chesney MA, et al. Socioeconomic inequalities in health. No easy solution. *JAMA : the journal of the American Medical Association* 1993;269(24):3140-5. [published Online First: 1993/06/23]
6. Weeramanthri TS, Dawkins HJS, Baynam G, et al. Editorial: Precision public health. *Frontiers in Public Health* 2018;6:1-3.
7. Khoury MJ, Iademarco MF, Riley WT. Precision Public Health for the Era of Precision Medicine. *Am J Prev Med* 2016;50(3):398-401. doi: 10.1016/j.amepre.2015.08.031

- 1  
2  
3 8. Khoury MJ, Galea S. Will Precision Medicine Improve Population Health? *JAMA : the*  
4  
5 *journal of the American Medical Association* 2016;316(13):1357-58. doi:  
6  
7 10.1001/jama.2016.12260 [published Online First: 2016/08/20]  
8  
9
- 10 9. Dowell SF, Blazes D, Desmond-Hellman S. Four steps to precision public health. *Nature*  
11  
12 2016;540:189-91.  
13
- 14 10. Ramaswami R, Bayer R, Galea S. Precision Medicine from a Public Health Perspective.  
15  
16 *Annu Rev Public Health* 2018;39:153-68. doi: 10.1146/annurev-publhealth-040617-  
17  
18 014158 [published Online First: 2017/11/23]  
19  
20
- 21 11. Evangelatos N, Satyamoorthy K, Brand A. Personalized health in a public health perspective.  
22  
23 *International journal of public health* 2018;63(4):433-34. doi: 10.1007/s00038-017-  
24  
25 1055-5 [published Online First: 2017/11/12]  
26  
27
- 28 12. Graham H. Social determinants and their unequal distribution: clarifying policy  
29  
30 understandings. *Milbank Q* 2004;82(1):101-24.  
31  
32
- 33 13. Link BG, Phelan J. Social conditions as fundamental causes of disease. *Journal of health and*  
34  
35 *social behavior* 1995;Spec No:80-94. [published Online First: 1995/01/01]  
36  
37
- 38 14. Graham H, Kelly MP. Health inequalities: concepts, frameworks and policy: NHS Health  
39  
40 Development Agency; 2004 [Available from:  
41  
42 [http://admin.nice.org.uk/niceMedia/pdf/health\\_inequalities\\_policy\\_graham.pdf](http://admin.nice.org.uk/niceMedia/pdf/health_inequalities_policy_graham.pdf) accessed  
43  
44 June 15, 2018.  
45  
46
- 47 15. Loignon AC, Woehr DJ. Social class in the organizational sciences: A conceptual integration  
48  
49 and meta-analytic review. *Journal of Management* 2017;epub ahead of print Sept 19,  
50  
51 2017:1-28.  
52  
53  
54  
55  
56  
57

- 1  
2  
3 16. Galobardes B, Shaw M, Lawlor DA, et al. Indicators of socioeconomic position (part 1). *J*  
4  
5 *Epidemiol Community Health* 2006;60(1):7-12. doi: 10.1136/jech.2004.023531  
6  
7  
8 17. Nuru-Jeter AM, Michaels EK, Thomas MD, et al. Relative Roles of Race Versus  
9  
10 Socioeconomic Position in Studies of Health Inequalities: A Matter of Interpretation.  
11  
12 *Annu Rev Public Health* 2018;39:169-88. doi: 10.1146/annurev-publhealth-040617-  
13  
14 014230 [published Online First: 2018/01/13]  
15  
16  
17 18. Bourdieu P. *Distinction: A social critique of the judgment of taste*. Cambridge, MA: Harvard  
18  
19 College 1984.  
20  
21 19. Singh-Manoux A, Adler NE, Marmot MG. Subjective social status: its determinants and its  
22  
23 association with measures of ill-health in the Whitehall II study. *Soc Sci Med*  
24  
25 2003;56(6):1321-33. [published Online First: 2003/02/26]  
26  
27  
28 20. Andersson MA. How do we assign ourselves social status? A cross-cultural test of the  
29  
30 cognitive averaging principle. *Soc Sci Res* 2015;52:317-29. doi:  
31  
32 10.1016/j.ssresearch.2015.02.009 [published Online First: 2015/05/26]  
33  
34  
35 21. Braveman PA, Cubbin C, Egerter S, et al. Socioeconomic status in health research: one size  
36  
37 does not fit all. *JAMA : the journal of the American Medical Association*  
38  
39 2005;294(22):2879-88. doi: 10.1001/jama.294.22.2879 [published Online First:  
40  
41 2005/12/15]  
42  
43  
44 22. Hinze SW, Lin J, Andersson TE. Can we capture the intersections? Older Black women,  
45  
46 education, and health. *Womens Health Issues* 2012;22(1):e91-8. doi:  
47  
48 10.1016/j.whi.2011.08.002 [published Online First: 2011/10/11]  
49  
50  
51  
52  
53  
54  
55  
56  
57  
58  
59  
60

- 1  
2  
3 23. Evans CR, Williams DR, Onnela JP, et al. A multilevel approach to modeling health  
4  
5 inequalities at the intersection of multiple social identities. *Soc Sci Med* 2017 doi:  
6  
7 10.1016/j.socscimed.2017.11.011 [published Online First: 2017/12/05]  
8  
9  
10 24. Veenstra G. Race, gender, class, and sexual orientation: intersecting axes of inequality and  
11  
12 self-rated health in Canada. *International journal for equity in health* 2011;10:3. doi:  
13  
14 10.1186/1475-9276-10-3 [published Online First: 2011/01/19]  
15  
16  
17 25. Hankivsky O, Christoffersen A. Intersectionality and the determinants of health: a Canadian  
18  
19 perspective. *Critical Public Health* 2008;18(3):271-83.  
20  
21  
22 26. Cole ER. Intersectionality and research in psychology. *American Psychologist*  
23  
24 2009;64(3):170-80.  
25  
26  
27 27. Altman DG, Royston P. The cost of dichotomising continuous variables. *BMJ*  
28  
29 2006;332(7549):1080. doi: 10.1136/bmj.332.7549.1080 [published Online First:  
30  
31 2006/05/06]  
32  
33 28. Zajacova A, Lawrence EM. The Relationship Between Education and Health: Reducing  
34  
35 Disparities Through a Contextual Approach. *Annu Rev Public Health* 2018;39:273-89.  
36  
37 doi: 10.1146/annurev-publhealth-031816-044628 [published Online First: 2018/01/13]  
38  
39  
40 29. Yuval-Davis N. Situated intersectionality and social inequality. *Presses de Sciences PO*  
41  
42 2015;58:91-100.  
43  
44  
45 30. Zajacova A. Education, gender, and mortality: does schooling have the same effect on  
46  
47 mortality for men and women in the US? *Soc Sci Med* 2006;63(8):2176-90. doi:  
48  
49 10.1016/j.socscimed.2006.04.031 [published Online First: 2006/06/20]  
50  
51  
52  
53  
54  
55  
56  
57  
58  
59  
60

- 1  
2  
3 31. Cutler D, Lleras-Muney A. Education and health: evaluating theories and evidence. In:  
4  
5 Schoeni R, House JS, Kaplan GA, et al., eds. Making americans healthier: Social and  
6  
7 economic policy as health policy. New York: Russell Sage Foundation 2008:29-60.  
8  
9
- 10 32. Ross CE, Masters R, Hummer RA. Education and the gender gaps in health and mortality.  
11  
12 *Demography* 2012 49:1157-83.  
13
- 14 33. Williams DR, Collins C. US socioeconomic and racial differences in health: patterns and  
15  
16 explanations. *Annual Reviews in Sociology* 1995 21:349-86.  
17
- 18 34. Williams DR, Jackson PB. Social sources of racial disparities in health. *Health Aff*  
19  
20 *(Millwood)* 2005;24(2):325-34. doi: 10.1377/hlthaff.24.2.325 [published Online First:  
21  
22 2005/03/11]  
23  
24  
25
- 26 35. Warner LR. A best practices guide to intersectional approaches in psychological research.  
27  
28 *Sex Roles* 2008;59:454-63.  
29
- 30 36. Bauer GR. Incorporating intersectionality theory into population health research  
31  
32 methodology: challenges and the potential to advance health equity. *Soc Sci Med*  
33  
34 2014;110:10-7. doi: 10.1016/j.socscimed.2014.03.022  
35  
36  
37
- 38 37. Graham H. Tackling inequalities in health in England: Remedying health disadvantages,  
39  
40 narrowing health gaps or reducing health gradients? *Journal of Social Policy*  
41  
42 2004;33(1):115-31.  
43
- 44 38. Adler NE, Boyce T, Chesney MA, et al. Socioeconomic status and health. The challenge of  
45  
46 the gradient. *The American psychologist* 1994;49(1):15-24. [published Online First:  
47  
48 1994/01/01]  
49
- 50 39. O'Neill J, Tabish H, Welch V, et al. Applying an equity lens to interventions: using  
51  
52 PROGRESS ensures consideration of socially stratifying factors to illuminate inequities  
53  
54  
55  
56  
57

- 1  
2  
3 in health. *Journal of clinical epidemiology* 2014;67(1):56-64. doi:  
4  
5 10.1016/j.jclinepi.2013.08.005  
6  
7  
8 40. Gianfrancesco MA, Tamang S, Yazdany J, et al. Potential Biases in Machine Learning  
9  
10 Algorithms Using Electronic Health Record Data. *JAMA Intern Med* 2018 doi:  
11  
12 10.1001/jamainternmed.2018.3763 [published Online First: 2018/08/22]  
13  
14  
15 41. Abichahine H, Veenstra G. Inter-categorical intersectionality and leisure-based physical  
16  
17 activity in Canada. *Health Promot Int* 2017;32(4):691-701. doi: 10.1093/heapro/daw009  
18  
19 [published Online First: 2016/03/16]  
20  
21  
22 42. Garnett BR, Masyn KE, Austin SB, et al. The intersectionality of discrimination attributes  
23  
24 and bullying among youth: an applied latent class analysis. *J Youth Adolesc*  
25  
26 2014;43(8):1225-39. doi: 10.1007/s10964-013-0073-8 [published Online First:  
27  
28 2013/12/10]  
29  
30  
31 43. Seng JS, Lopez WD, Sperlich M, et al. Marginalized identities, discrimination burden, and  
32  
33 mental health: empirical exploration of an interpersonal-level approach to modeling  
34  
35 intersectionality. *Soc Sci Med* 2012;75(12):2437-45. doi:  
36  
37 10.1016/j.socscimed.2012.09.023 [published Online First: 2012/10/24]  
38  
39  
40 44. Winkleby MA, Flora JA, Kraemer HC. A community-based heart disease intervention:  
41  
42 predictors of change. *Am J Public Health* 1994;84(5):767-72. [published Online First:  
43  
44 1994/05/01]  
45  
46  
47 45. Frank LD, Kerr J, Sallis JF, et al. A hierarchy of sociodemographic and environmental  
48  
49 correlates of walking and obesity. *Prev Med* 2008;47(2):172-8. doi:  
50  
51 10.1016/j.ypmed.2008.04.004 [published Online First: 2008/06/21]  
52  
53  
54  
55  
56  
57  
58  
59  
60

- 1  
2  
3 46. Wewers ME, Salsberry PJ, Ferketich AK, et al. Risk factors for smoking in rural women. *J*  
4  
5 *Womens Health (Larchmt)* 2012;21(5):548-56. doi: 10.1089/jwh.2011.3183 [published  
6  
7 Online First: 2012/03/01]  
8  
9
- 10 47. Lakerveld J, Loyen A, Schotman N, et al. Sitting too much: A hierarchy of socio-  
11  
12 demographic correlates. *Prev Med* 2017;101:77-83. doi: 10.1016/j.ypmed.2017.05.015  
13  
14 [published Online First: 2017/05/30]  
15  
16
- 17 48. Mulinari S, Wemrell M, Ronnerstrand B, et al. Categorical and anti-categorical approaches to  
18  
19 US racial/ethnic groupings: revisiting the National 2009 H1N1 Flu Survey (NHFS).  
20  
21 *Critical Public Health* 2017:1-13.  
22  
23
- 24 49. Ip EH, Rahmandad H, Shoham DA, et al. Reconciling statistical and systems science  
25  
26 approaches to public health. *Health Educ Behav* 2013;40(1 Suppl):123S-31S. doi:  
27  
28 10.1177/1090198113493911 [published Online First: 2013/10/23]  
29  
30
- 31 50. Blackman T. Exploring Explanations for Local Reductions in Teenage Pregnancy Rates in  
32  
33 England: An Approach Using Qualitative Comparative Analysis. *Soc Policy Soc*  
34  
35 2013;12(1):61-72. doi: 10.1017/S1474746412000358 [published Online First:  
36  
37 2014/01/01]  
38  
39
- 40 51. Valentine G. Theorizing and Researching Intersectionality: A Challenge for Feminist  
41  
42 Geography. *The Professional Geographer* 2007;59(1):10-21.  
43  
44
- 45 52. Campbell M, Ballas D. SimAlba: A Spatial Microsimulation Approach to the Analysis of  
46  
47 Health Inequalities. *Front Public Health* 2016;4:230. doi: 10.3389/fpubh.2016.00230  
48  
49 [published Online First: 2016/11/08]  
50  
51  
52  
53  
54  
55  
56  
57  
58  
59  
60

- 1  
2  
3 53. Pavea G, Lewis DW, Dawson JA, et al. Social status and energy intake: a randomized  
4 controlled experiment. *Clin Obes* 2017;7(5):316-22. doi: 10.1111/cob.12198 [published  
5 Online First: 2017/09/07]  
6  
7  
8  
9  
10 54. Shih M, Pittinsky TL, Ambady N. Stereotype susceptibility: Identity salience and shifts in  
11 quantitative performance. *Psychological science* 1999;10(1):80-83.  
12  
13  
14 55. Sokolowski R. Introduction to phenomenology. Cambridge, UK: Cambridge University Press  
15 2000.  
16  
17  
18  
19 56. Agar M. The professional stranger. San Diego, CA: Academic Press 1996.  
20  
21 57. Barr B, Higginson J, Whitehead M. Investigating the impact of the English health  
22 inequalities strategy: time trend analysis. *Bmj-Brit Med J* 2017;358 doi: ARTN j3310  
23 10.1136/bmj.j3310  
24  
25  
26  
27  
28 58. Mackenbach JP. Has the English strategy to reduce health inequalities failed? *Soc Sci Med*  
29 2010;71(7):1249-53; discussion 54-8. doi: 10.1016/j.socscimed.2010.07.014  
30  
31  
32  
33 59. Mackenbach JP. The persistence of health inequalities in modern welfare states: the  
34 explanation of a paradox. *Soc Sci Med* 2012;75(4):761-9. doi:  
35 10.1016/j.socscimed.2012.02.031  
36  
37  
38  
39  
40 60. Mackenbach JP. Nordic paradox, Southern miracle, Eastern disaster: persistence of  
41 inequalities in mortality in Europe. *European journal of public health*  
42 2017;27(suppl\_4):14-17. doi: 10.1093/eurpub/ckx160 [published Online First:  
43 2017/10/14]  
44  
45  
46  
47  
48  
49 61. Mackenbach JP, Bos V, Andersen O, et al. Widening socioeconomic inequalities in mortality  
50 in six Western European countries. *Int J Epidemiol* 2003;32(5):830-7.  
51  
52  
53  
54  
55  
56  
57  
58  
59  
60

- 1  
2  
3 62. Olstad DL, Ancilotto R, Teychenne M, et al. Can targeted policies reduce obesity and  
4  
5 improve obesity-related behaviours in socioeconomically disadvantaged populations? A  
6  
7 systematic review. *Obes Rev* 2017;18(7):791-807. doi: 10.1111/obr.12546 [published  
8  
9 Online First: 2017/04/24]  
10  
11  
12 63. Olstad DL, Teychenne M, Minaker LM, et al. Can policy ameliorate socioeconomic  
13  
14 inequities in obesity and obesity-related behaviours? A systematic review of the impact  
15  
16 of universal policies on adults and children. *Obes Rev* 2016;17(12):1198-217. doi:  
17  
18 10.1111/obr.12457  
19  
20  
21 64. Beckie TM. A systematic review of allostatic load, health, and health disparities. *Biol Res*  
22  
23 *Nurs* 2012;14(4):311-46. doi: 10.1177/1099800412455688 [published Online First:  
24  
25 2012/09/26]  
26  
27  
28 65. Carey G, Crammond B. A glossary of policy frameworks: the many forms of 'universalism'  
29  
30 and policy 'targeting'. *J Epidemiol Community Health* 2017;71(3):303-07. doi:  
31  
32 10.1136/jech-2014-204311 [published Online First: 2014/10/09]  
33  
34  
35 66. Frohlich KL, Potvin L. Transcending the known in public health practice: the inequality  
36  
37 paradox: the population approach and vulnerable populations. *Am J Public Health*  
38  
39 2008;98(2):216-21. doi: 10.2105/AJPH.2007.114777  
40  
41  
42 67. McLaren L, McIntyre L, Kirkpatrick S. Rose's population strategy of prevention need not  
43  
44 increase social inequalities in health. *Int J Epidemiol* 2010;39(2):372-7. doi:  
45  
46 10.1093/ije/dyp315  
47  
48  
49 68. Pearson-Stuttard J, Bandosz P, Rehm CD, et al. Reducing US cardiovascular disease burden  
50  
51 and disparities through national and targeted dietary policies: A modelling study. *PLoS*  
52  
53  
54  
55  
56  
57  
58  
59  
60

- 1  
2  
3 *Med* 2017;14(6):e1002311. doi: 10.1371/journal.pmed.1002311 [published Online First:  
4  
5 2017/06/07]  
6  
7
- 8 69. Platt JM, Keyes KM, Galea S. Efficiency or equity? Simulating the impact of high-risk and  
9  
10 population intervention strategies for the prevention of disease. *SSM Population Health*  
11  
12 2017;3:1-8.  
13
- 14 70. Rose G. Sick individuals and sick populations. *Int J Epidemiol* 1985;14(1):32-8. [published  
15  
16 Online First: 1985/03/01]  
17
- 18 71. Carey G, Crammond B, De Leeuw E. Towards health equity: a framework for the application  
19  
20 of proportionate universalism. *International journal for equity in health* 2015;14:81. doi:  
21  
22 10.1186/s12939-015-0207-6 [published Online First: 2015/09/16]  
23  
24
- 25 72. Marmot M, Allen J, Goldblatt P, et al. The Marmot Review. Fair Society, Health Lives 2010  
26  
27 [Available from: [http://www.instituteofhealthequity.org/resources-reports/fair-society-](http://www.instituteofhealthequity.org/resources-reports/fair-society-healthy-lives-the-marmot-review/fair-society-healthy-lives-full-report-pdf.pdf)  
28  
29 [healthy-lives-the-marmot-review/fair-society-healthy-lives-full-report-pdf.pdf](http://www.instituteofhealthequity.org/resources-reports/fair-society-healthy-lives-the-marmot-review/fair-society-healthy-lives-full-report-pdf.pdf) accessed  
30  
31 March 6 2019.  
32  
33
- 34 73. Kypridemos C, Allen K, Hickey GL, et al. Cardiovascular screening to reduce the burden  
35  
36 from cardiovascular disease: microsimulation study to quantify policy options. *BMJ*  
37  
38 2016;353:i2793. doi: 10.1136/bmj.i2793 [published Online First: 2016/06/10]  
39  
40
- 41 74. Hargrove TW. Intersecting Social Inequalities and Body Mass Index Trajectories from  
42  
43 Adolescence to Early Adulthood. *Journal of health and social behavior* 2018;59(1):56-  
44  
45 73. doi: 10.1177/0022146517746672 [published Online First: 2018/01/05]  
46  
47  
48  
49  
50  
51  
52  
53  
54  
55  
56  
57  
58  
59  
60
